# Supplementary material for: Platinum(ii) complexes of benzannulated N∧N−∧O-amido ligands: bright orange phosphors with long-lived excited states
Source: Royal Society of Chemistry journal article supplement (doi:10.1039/d1qi01120k), 2021-10-27
Supplement: d1qi01120k4.pdf [file d1qi01120k4.pdf]

*Supporting Information*

*for*

Platinum(II) Complexes of Benzannulated N<sup>+</sup>N<sup>-</sup>O-  
Amido Ligands: Bright Orange Phosphors With  
Long-Lived Excited States

*Issiah B. Lozada,<sup>a</sup> J. A. Gareth Williams,<sup>b,\*</sup> and David E. Herbert<sup>a,\*</sup>*

<sup>a</sup> Department of Chemistry and the Manitoba Institute for Materials, University of Manitoba, 144  
Dysart Road, Winnipeg, Manitoba, R3T 2N2, Canada;

\*david.herbert@umanitoba.ca

<sup>b</sup> Department of Chemistry, Durham University, Durham, DH1 3LE, UK;

\*j.a.g.williams@durham.ac.uk

## Table of Contents

|                                                                                                                                                                                                                                                                                                                                                                                                                           |    |
|---------------------------------------------------------------------------------------------------------------------------------------------------------------------------------------------------------------------------------------------------------------------------------------------------------------------------------------------------------------------------------------------------------------------------|----|
| <b>Figure S1.</b> Cyclic voltammograms (—) and differential pulse voltammograms (---) of <b>L1-L4</b> in CH <sub>2</sub> Cl <sub>2</sub> with 0.1 mM of [NBu <sub>4</sub> ][PF <sub>6</sub> ] as the supporting electrolyte, glassy carbon as the working electrode, and Pt wire as the counter electrodes. CV scan rates were 100 mV/s. Potentials are listed vs. FcH <sup>0/+</sup> redox couple (FcH = ferrocene)..... | 5  |
| <b>Figure S2.</b> Scan rate dependence of cathodic events for <b>1-4</b> . .....                                                                                                                                                                                                                                                                                                                                          | 6  |
| <b>Figure S3.</b> UV-Vis spectra of <b>L1-L4</b> in CH <sub>2</sub> Cl <sub>2</sub> at 298 K. Inset shows normalized spectra. ....                                                                                                                                                                                                                                                                                        | 7  |
| <b>Figure S4.</b> Correlation between $E_{CT,exp}$ (cm <sup>-1</sup> ) on Reichardt's solvent $E_N^T$ parameters with aprotic and protic solvents treated together (---), and protic (---) and aprotic (---) solvents treated separately. ....                                                                                                                                                                            | 8  |
| <b>Figure S5.</b> Correlation between $E_{CT,exp}$ . (cm <sup>-1</sup> ) and $E_{CT,calc}$ . (cm <sup>-1</sup> ) calculated using Catalan's multiparameter solvent approach.....                                                                                                                                                                                                                                          | 8  |
| <b>Table S1.</b> Reichardt's $E_N^T$ and Catalan solvent (SP, SdP, SA and SB) parameters for <b>4</b> . ....                                                                                                                                                                                                                                                                                                              | 9  |
| <b>Table S2.</b> Catalan solvent parameter coefficients and statistics obtained from linear regression. ....                                                                                                                                                                                                                                                                                                              | 9  |
| <b>Figure S6.</b> Solid-state structure of <b>4</b> showing hydrogen bonding interaction with co-crystallized CHCl <sub>3</sub> solvent molecules. ....                                                                                                                                                                                                                                                                   | 10 |
| <b>Estimation of empirical HOMO-LUMO energies from UV-Vis absorbance and cyclic voltammetry</b> .....                                                                                                                                                                                                                                                                                                                     | 11 |
| <b>Figure S7.</b> Correlation between experimentally and computationally derived (a) HOMO and (b) LUMO energies of <b>1-4</b> .....                                                                                                                                                                                                                                                                                       | 12 |
| <b>Table S3.</b> Select optimized structural parameters for the ground state ( <sup>1</sup> GS <sub>eq</sub> ) <b>1-4</b> (RIJCOSX-rPBE0-D3(BJ)/def2-TZVP(-f)+def2/J). ....                                                                                                                                                                                                                                               | 13 |
| <b>Table S4.</b> Select optimized structural parameters for the lowest excited triplet state of <b>1-4</b> (RIJCOSX-uPBE0-D3(BJ)/def2-TZVP(-f)+def2/J). ....                                                                                                                                                                                                                                                              | 13 |
| <b>Table S5.</b> Fragment contributions to the ground state MOs of <b>1</b> . ....                                                                                                                                                                                                                                                                                                                                        | 13 |
| <b>Table S6.</b> Fragment contributions to the ground state MOs of <b>2</b> . ....                                                                                                                                                                                                                                                                                                                                        | 14 |
| <b>Table S7.</b> Fragment contributions to the ground state MOs of <b>3</b> . ....                                                                                                                                                                                                                                                                                                                                        | 14 |
| <b>Table S8.</b> Fragment contributions to the ground state MOs of <b>4</b> . ....                                                                                                                                                                                                                                                                                                                                        | 14 |
| <b>Figure S8.</b> Effects of inclusion of spin-orbit coupling on the calculated UV-Vis absorption spectra of <b>4</b> . ....                                                                                                                                                                                                                                                                                              | 15 |
| <b>Figure S9.</b> TDDFT simulated SOC-corrected spectrum (—), vertical excitations (—), and oscillator strengths of <b>1</b> in CH <sub>2</sub> Cl <sub>2</sub> . Calculated energies and molar absorptivities (M <sup>-1</sup> cm <sup>-1</sup> ) at each peak maxima are shown with experimental (in parentheses). ....                                                                                                 | 15 |
| <b>Table S9.</b> Spin-only and SOC-corrected TDDFT predicted singlet-singlet, singlet-triplet, and singlet-SOC vertical excitation energies ( $f > 0.003$ ), MO contributions (>10%), singlet/triplet contributions (>5 %) for <b>1</b> . Entries in red reflect SOC calculated transitions which appear in valley regions of the absorption spectrum. ....                                                               | 16 |

|                                                                                                                                                                                                                                                                                                                                                                 |    |
|-----------------------------------------------------------------------------------------------------------------------------------------------------------------------------------------------------------------------------------------------------------------------------------------------------------------------------------------------------------------|----|
| <b>Figure S10.</b> TDDFT simulated SOC-corrected spectrum (—), vertical excitations (—), and oscillator strengths of <b>2</b> in CH <sub>2</sub> Cl <sub>2</sub> . Calculated energies and molar absorptivities (M <sup>-1</sup> cm <sup>-1</sup> ) at each peak maxima are shown with experimental (in parentheses). .....                                     | 17 |
| <b>Table S10.</b> Spin-only and SOC-corrected TDDFT predicted singlet-singlet, singlet-triplet, and singlet-SOC vertical excitation energies ( $f > 0.003$ ), MO contributions (>10%) and singlet/triplet contributions (>5 %) for <b>2</b> . Entries in red reflect SOC calculated transitions which appear in valley regions of the absorption spectrum. .... | 18 |
| <b>Figure S11.</b> TDDFT simulated SOC-corrected spectrum (—), vertical excitations (—), and oscillator strengths of <b>3</b> in CH <sub>2</sub> Cl <sub>2</sub> . Calculated energies and molar absorptivities (M <sup>-1</sup> cm <sup>-1</sup> ) at each peak maxima are shown with experimental (in parentheses). .....                                     | 19 |
| <b>Table S11.</b> Spin-only and SOC-corrected TDDFT predicted singlet-singlet, singlet-triplet, and singlet-SOC vertical excitation energies ( $f > 0.003$ ), MO contributions (>10%), singlet/triplet contributions (>5 %) for <b>3</b> . Entries in red reflect SOC calculated transitions which appear in valley regions of the absorption spectrum. ....    | 20 |
| <b>Figure S12.</b> TDDFT simulated SOC-corrected spectrum (—), vertical excitations (—), and oscillator strengths of <b>4</b> in CH <sub>2</sub> Cl <sub>2</sub> . Calculated energies and molar absorptivities (M <sup>-1</sup> cm <sup>-1</sup> ) at each peak maxima are shown with experimental (in parentheses). .....                                     | 21 |
| <b>Table S12.</b> Spin-only and SOC-corrected TDDFT predicted singlet-singlet, singlet-triplet, and singlet-SOC vertical excitation energies ( $f > 0.003$ ), MO contributions (>10%), singlet/triplet contributions (>5 %) for <b>4</b> . Entries in red reflect SOC calculated transitions which appear in valley regions of the absorption spectrum. ....    | 22 |
| <b>Figure S13.</b> Schematic of photophysical processes and calculated parameters.....                                                                                                                                                                                                                                                                          | 24 |
| <b>Table S13.</b> Calculated rate of intersystem crossing from <sup>1</sup> S <sub>1</sub> ( <sup>1</sup> GS <sub>eq</sub> ) and <sup>1</sup> S <sub>7</sub> ( <sup>1</sup> GS <sub>eq</sub> ) to the three substates of <sup>3</sup> T <sub>1,eq</sub> ( $M_S = -1, 0, +1$ ) for <b>4</b> at 298 K and 77 K in CH <sub>2</sub> Cl <sub>2</sub> . ....          | 24 |
| <b>Table S14.</b> Calculated phosphorescence parameters for <b>4</b> at 298 K and 77 K in CH <sub>2</sub> Cl <sub>2</sub> . ....                                                                                                                                                                                                                                | 24 |
| <b>Figure S14.</b> TDDFT simulated (FWHM = 3000 cm <sup>-1</sup> , T = 298 K) and experimental (T = 295 K) phosphorescence spectra of <b>4</b> in CH <sub>2</sub> Cl <sub>2</sub> . The three substates ( $M_S = -1, 0, +1$ ) of the lowest excited triplet state are considered. ....                                                                          | 25 |
| <b>Figure S15.</b> TDDFT simulated (FWHM = 3000 cm <sup>-1</sup> , CH <sub>2</sub> Cl <sub>2</sub> ) and experimental phosphorescence spectra of <b>4</b> at 77 K. The three substates ( $M_S = -1, 0, +1$ ) of the lowest excited triplet state are considered. ....                                                                                           | 25 |
| <b>Figure S16.</b> Stackplot of emission spectra of <b>1-4</b> in EPA (diethyl ether / isopentane / ethanol 2:2:1 v/v) at 77 K. ....                                                                                                                                                                                                                            | 26 |
| <b>Figure S17.</b> Spin density maps (isovalue = 0.004) of <b>1-4</b> at the equilibrium geometries of the lowest-lying excited triplet state. Shown in square brackets are the Löwdin/Mulliken spin densities on Pt. ....                                                                                                                                      | 26 |
| <b>NMR and HRMS Figures</b> .....                                                                                                                                                                                                                                                                                                                               | 27 |
| <b>Figure S18.</b> <sup>1</sup> H NMR (500 MHz, 25 °C) spectrum of <b>1</b> in CDCl <sub>3</sub> .....                                                                                                                                                                                                                                                          | 27 |
| <b>Figure S19.</b> <sup>13</sup> C{ <sup>1</sup> H} NMR (125 MHz, 25 °C) spectrum of <b>1</b> in CDCl <sub>3</sub> .....                                                                                                                                                                                                                                        | 28 |
| <b>Figure S20.</b> <sup>1</sup> H- <sup>1</sup> H COSY spectrum of <b>1</b> in CDCl <sub>3</sub> .....                                                                                                                                                                                                                                                          | 28 |

|                                                                                                                          |    |
|--------------------------------------------------------------------------------------------------------------------------|----|
| <b>Figure S21.</b> HSQC spectrum of <b>1</b> in CDCl <sub>3</sub> .....                                                  | 29 |
| <b>Figure S22.</b> HMBC spectrum of <b>1</b> in CDCl <sub>3</sub> . .....                                                | 29 |
| <b>Figure S23.</b> HRMS (ESI-TOF positive mode) of <b>1</b> . .....                                                      | 29 |
| <b>Figure S24.</b> <sup>1</sup> H NMR (500 MHz, 25 °C) spectrum of <b>2</b> in CDCl <sub>3</sub> .....                   | 30 |
| <b>Figure S25.</b> <sup>13</sup> C{ <sup>1</sup> H} NMR (125 MHz, 25 °C) spectrum of <b>2</b> in CDCl <sub>3</sub> ..... | 30 |
| <b>Figure S26.</b> <sup>1</sup> H- <sup>1</sup> H COSY spectrum of <b>2</b> in CDCl <sub>3</sub> .....                   | 31 |
| <b>Figure S27.</b> HSQC spectrum of <b>2</b> in CDCl <sub>3</sub> .....                                                  | 31 |
| <b>Figure S28.</b> HMBC spectrum of <b>2</b> in CDCl <sub>3</sub> . .....                                                | 32 |
| <b>Figure S29.</b> 2D-NOESY spectrum of <b>2</b> in CDCl <sub>3</sub> .....                                              | 32 |
| <b>Figure S30.</b> HRMS (ESI-TOF positive mode) of <b>2</b> . .....                                                      | 33 |
| <b>Optimized Coordinates</b> .....                                                                                       | 34 |
| <b>REFERENCES</b> .....                                                                                                  | 41 |

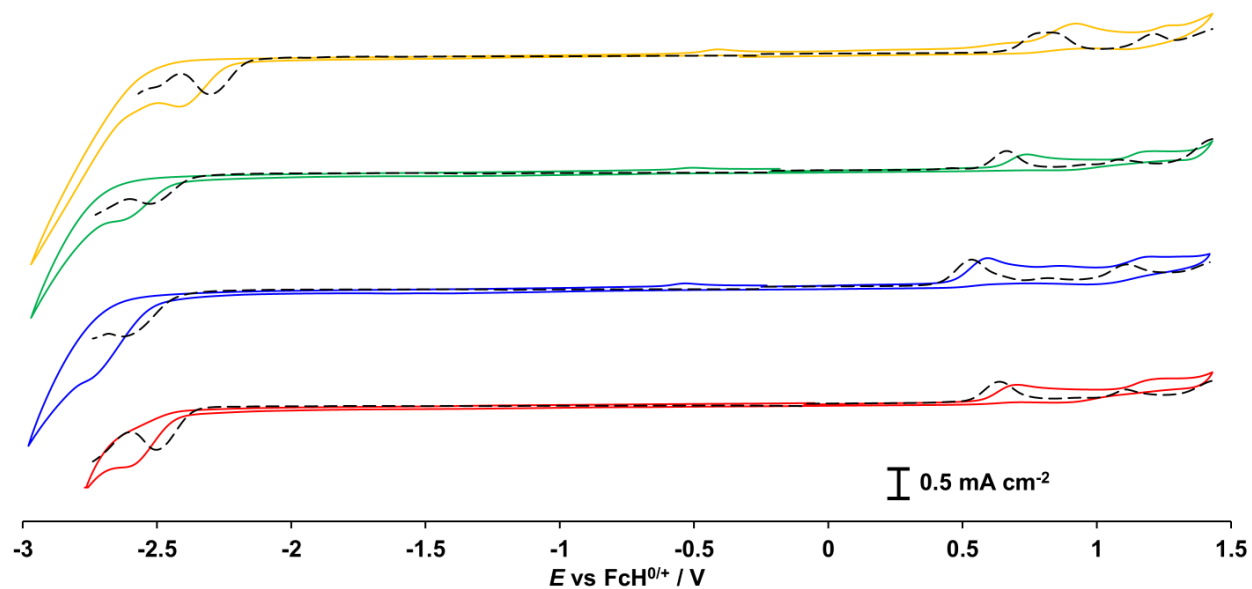

**Figure S1.** Cyclic voltammograms (—) and differential pulse voltammograms (---) of **L1-L4** in  $\text{CH}_2\text{Cl}_2$  with 0.1 mM of  $[\text{NBu}_4][\text{PF}_6]$  as the supporting electrolyte, glassy carbon as the working electrode, and Pt wire as the counter electrodes. CV scan rates were 100 mV/s. Potentials are listed vs.  $FcH^{0/+}$  redox couple (FcH = ferrocene).

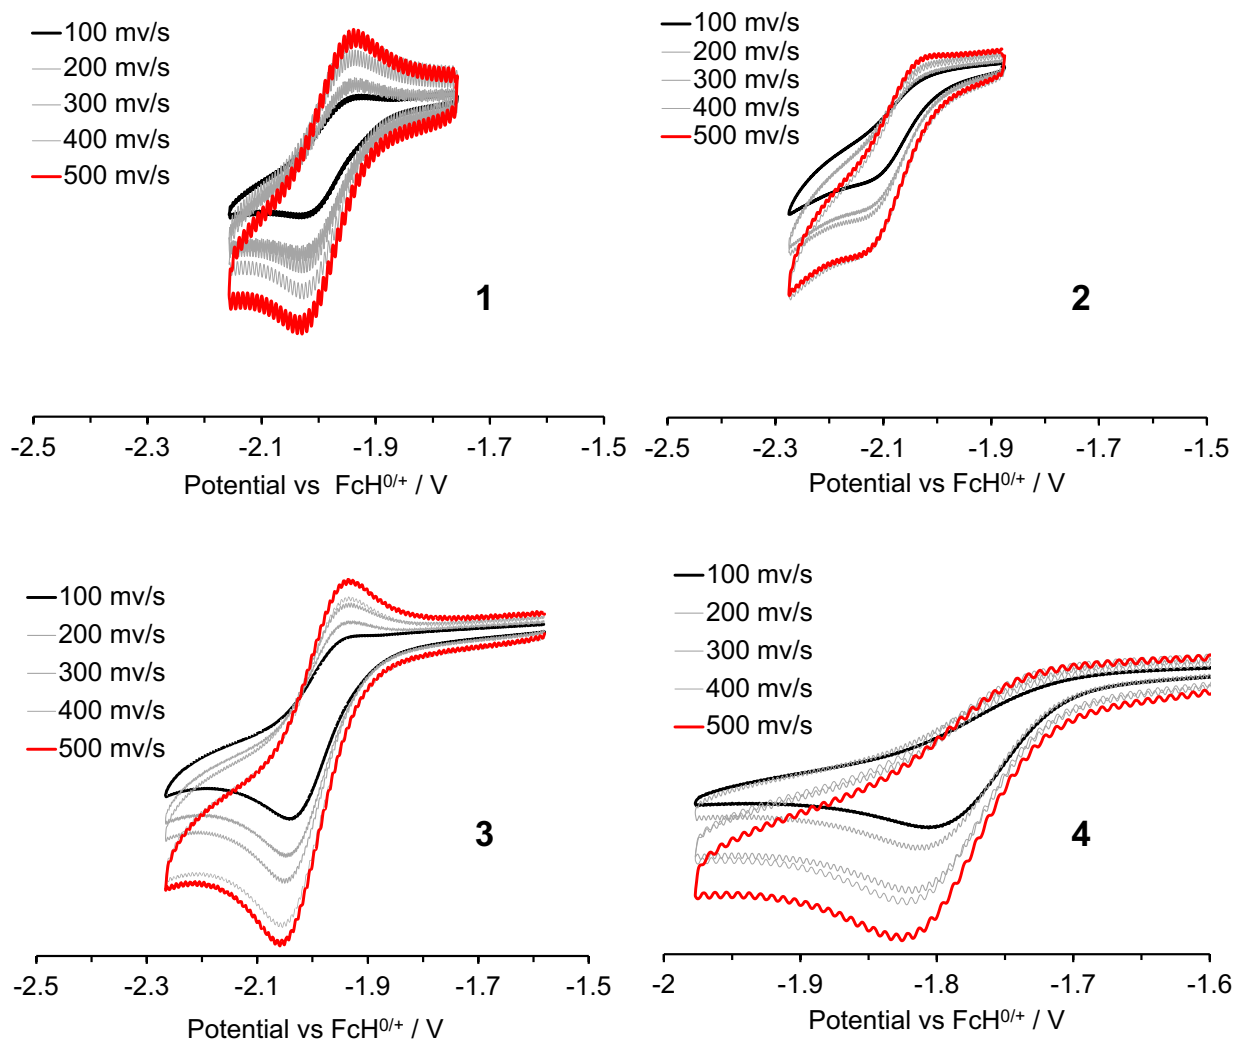

**Figure S2.** Scan rate dependence of cathodic events for 1-4.

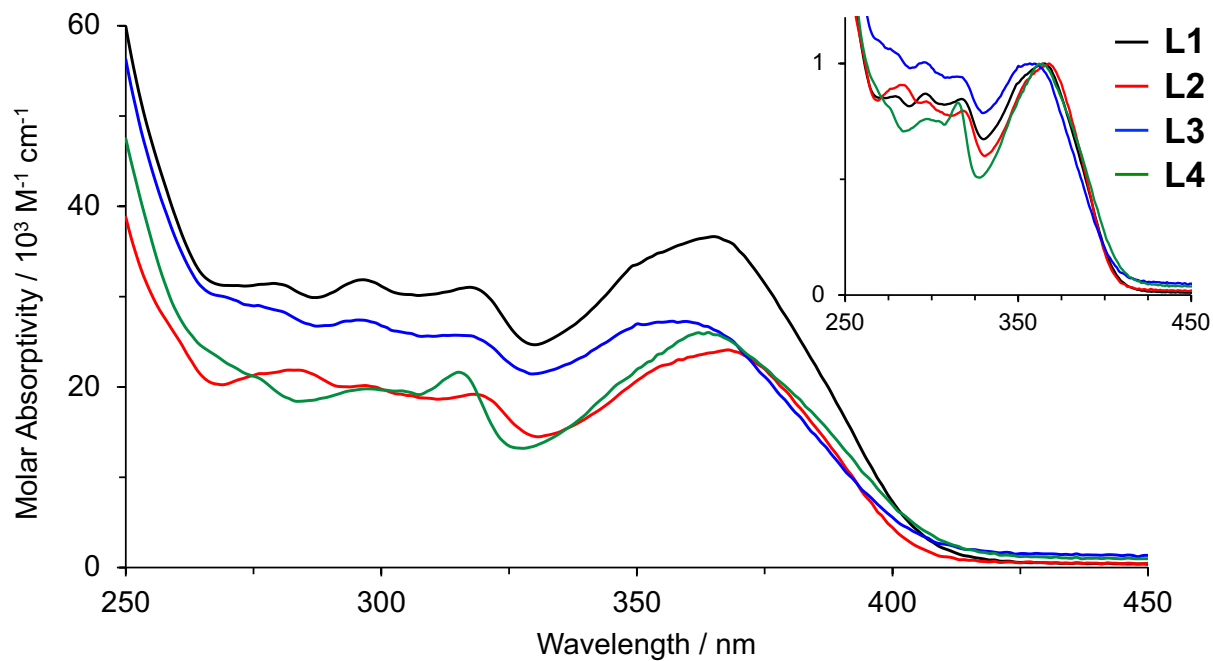

**Figure S3.** UV-Vis spectra of **L1-L4** in CH<sub>2</sub>Cl<sub>2</sub> at 298 K. Inset shows normalized spectra.

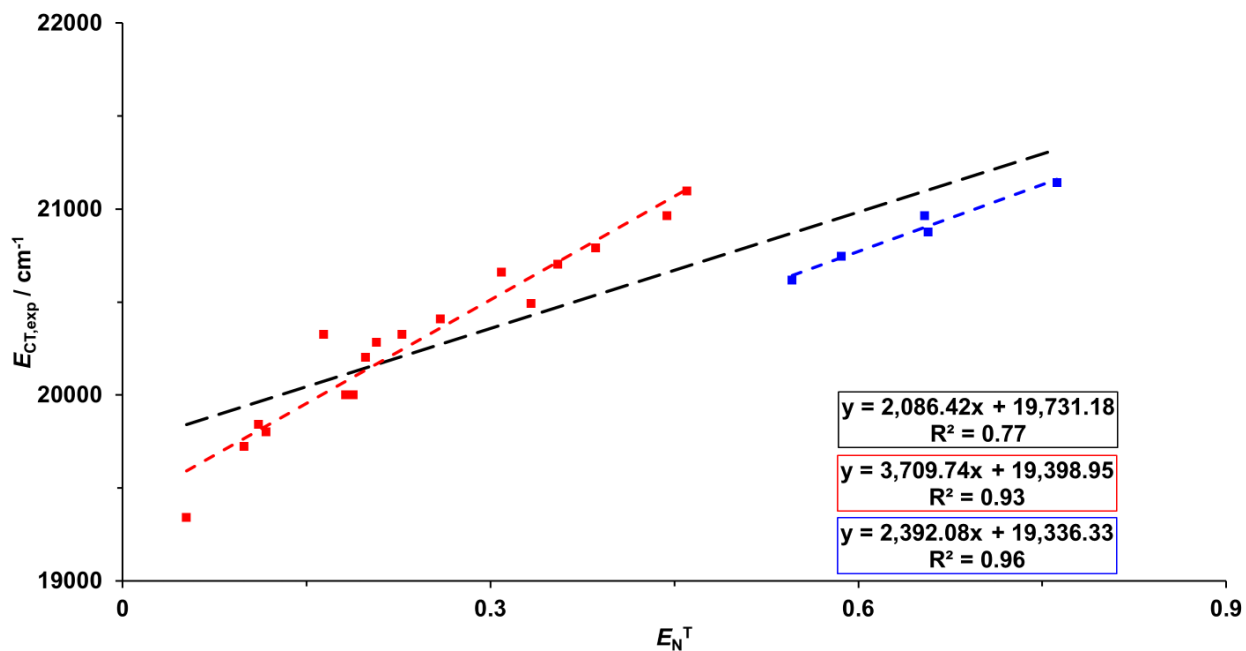

**Figure S4.** Correlation between  $E_{CT,exp}$  ( $\text{cm}^{-1}$ ) on Reichardt's solvent  $E_N^T$  parameters with aprotic and protic solvents treated together (---), and protic (---) and aprotic (---) solvents treated separately.

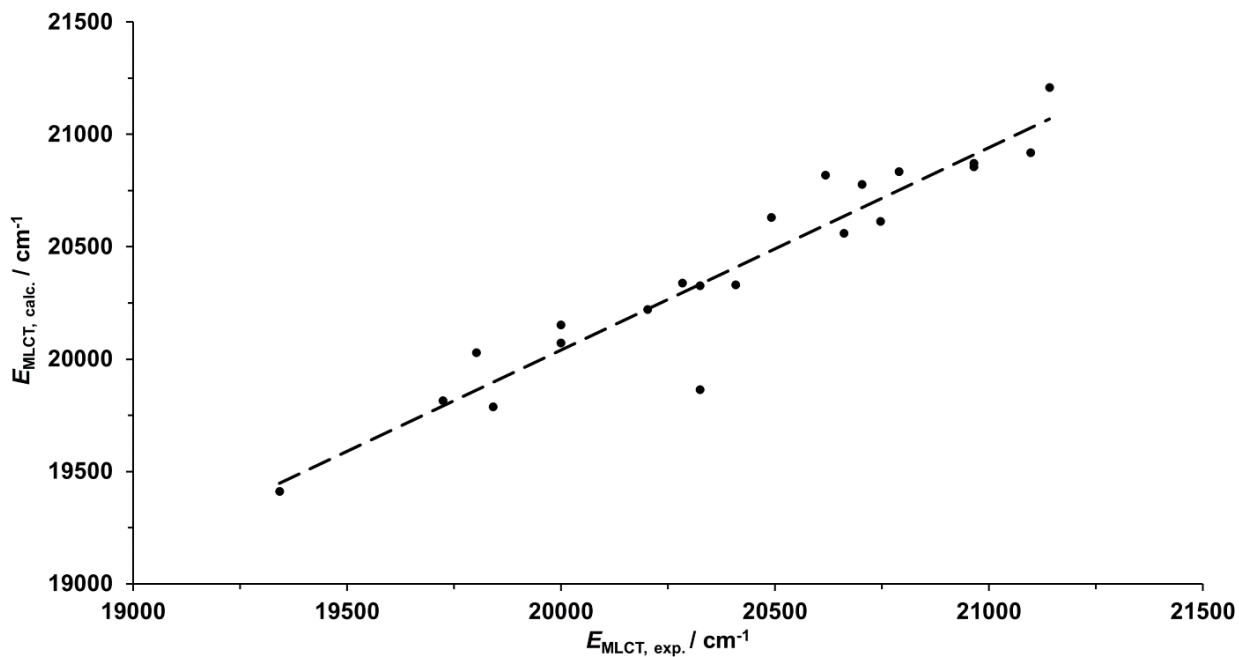

**Figure S5.** Correlation between  $E_{CT,exp}$ . ( $\text{cm}^{-1}$ ) and  $E_{CT,calc.}$  ( $\text{cm}^{-1}$ ) calculated using Catalan's multiparameter solvent approach.



**Table S1.** Reichardt's  $E_N^T$  and Catalan solvent (SP, SdP, SA and SB) parameters for **4**.

| Solvent                         | $\lambda_{\text{abs,CT/nm}}$ | $E_{\text{CT/cm}^{-1}}$ | SP    | SdP   | SA    | SB    | $E_N^T$ |
|---------------------------------|------------------------------|-------------------------|-------|-------|-------|-------|---------|
| CCl <sub>4</sub>                | 517                          | 19342                   | 0.768 | 0     | 0     | 0.044 | 0.052   |
| benzene                         | 504                          | 19841                   | 0.793 | 0.27  | 0     | 0.124 | 0.111   |
| toluene                         | 507                          | 19724                   | 0.782 | 0.284 | 0     | 0.128 | 0.099   |
| CHCl <sub>3</sub>               | 490                          | 20408                   | 0.783 | 0.614 | 0.047 | 0.071 | 0.259   |
| Et <sub>2</sub> O               | 505                          | 19802                   | 0.617 | 0.385 | 0     | 0.562 | 0.117   |
| anisole                         | 495                          | 20202                   | 0.82  | 0.543 | 0.084 | 0.299 | 0.198   |
| CH <sub>2</sub> Cl <sub>2</sub> | 484                          | 20661                   | 0.761 | 0.769 | 0.04  | 0.178 | 0.309   |
| ClPh                            | 500                          | 20000                   | 0.833 | 0.537 | 0     | 0.182 | 0.188   |
| BrPh                            | 500                          | 20000                   | 0.875 | 0.497 | 0     | 0.192 | 0.182   |
| THF                             | 493                          | 20284                   | 0.714 | 0.634 | 0     | 0.591 | 0.207   |
| acetone                         | 483                          | 20704                   | 0.651 | 0.907 | 0     | 0.475 | 0.355   |
| DMF                             | 481                          | 20790                   | 0.759 | 0.977 | 0.031 | 0.613 | 0.386   |
| CH <sub>3</sub> CN              | 474                          | 21097                   | 0.645 | 0.974 | 0.044 | 0.286 | 0.46    |
| DMSO                            | 474                          | 21097                   | 0.83  | 1     | 0.072 | 0.647 | 0.444   |
| CNPh                            | 488                          | 20492                   | 0.851 | 0.852 | 0.047 | 0.281 | 0.333   |
| EtOAc                           | 492                          | 20325                   | 0.656 | 0.603 | 0     | 0.542 | 0.228   |
| <i>i</i> ProH                   | 485                          | 20619                   | 0.633 | 0.808 | 0.283 | 0.83  | 0.546   |
| 1-BuOH                          | 482                          | 20747                   | 0.674 | 0.655 | 0.341 | 0.809 | 0.586   |
| CH <sub>3</sub> OH              | 473                          | 21142                   | 0.608 | 0.904 | 0.605 | 0.545 | 0.762   |
| EtOH                            | 477                          | 20964                   | 0.633 | 0.783 | 0.4   | 0.658 | 0.654   |
| 2OMeEtOH                        | 479                          | 20877                   | -     | -     | -     | -     | 0.657   |

**Table S2.** Catalan solvent parameter coefficients and statistics obtained from linear regression.

| Regression Statistics |       |                  | Coefficients | Standard Error | t statistic | P-value  |
|-----------------------|-------|------------------|--------------|----------------|-------------|----------|
| Multiple R            | 0.974 | <b>Intercept</b> | 19619        | 368            | 53.326      | 0.000    |
| R Square              | 0.948 | <b>SP</b>        | -402         | 452            | -0.890      | 0.387    |
| Adjusted R Square     | 0.935 | <b>SdP</b>       | 1649         | 133            | 12.382      | 2.81E-09 |
| Standard Error        | 130.4 | <b>SA</b>        | 774          | 220            | 3.517       | 0.003    |
| Observations          | 20    | <b>SB</b>        | -151         | 176            | -0.860      | 0.403    |

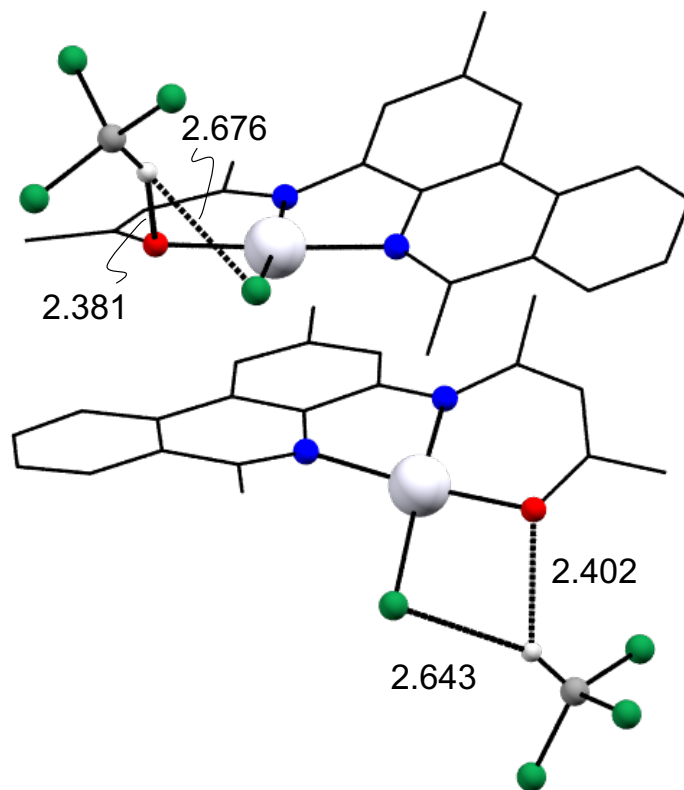

**Figure S6.** Solid-state structure of **4** showing hydrogen bonding interaction with co-crystallized  $\text{CHCl}_3$  solvent molecules.

## Estimation of empirical HOMO-LUMO energies from UV-Vis absorbance and cyclic voltammetry

Following a similar procedure employed Pan and co-workers<sup>1</sup>, we estimated the HOMO and LUMO energies using the following equations:

$$E_{HOMO} = -(E_{onset,ox} + 4.8 - E_{FcH}) \quad (1)$$

$$E_{LUMO} = -(E_{onset,red} + 4.8 - E_{FcH}) \quad (2)$$

where  $E_{HOMO}$  and  $E_{LUMO}$  are the HOMO and LUMO energies,  $E_{onset,ox}$  and  $E_{onset,red}$  are the onset oxidation and reduction potentials estimated using DPV, 4.8 is the reference energy level of ferrocene (FcH, 4.8 eV below the vacuum level), and  $E_{FcH}$  is the FcH<sup>0/+</sup> potential vs. Ag/AgCl similarly estimated with DPV. Electrochemical parameters and experimentally derived HOMO-LUMO energies and gaps are summarized in Table 1. To corroborate the parameters and trends obtained from electrochemistry, we also estimated the optical gap ( $E_g$ ) from the UV-Vis spectra of all compounds. This can be estimated from the following equation

$$E_g = \frac{hc}{\lambda_{onset}} \quad (3)$$

where  $h$  is Planck's constant,  $c$  is the speed of light in vacuum, and  $\lambda_{onset}$  is the onset of the UV-Vis spectra. We introduce a modification to equation (3) for the Pt(II) complexes. TDDFT analyses (see below) reveal that the lowest energy manifold can largely be assigned to HOMO→LUMO transitions leading to

$$E_g = \frac{hc}{\lambda_{max}} \quad (4)$$

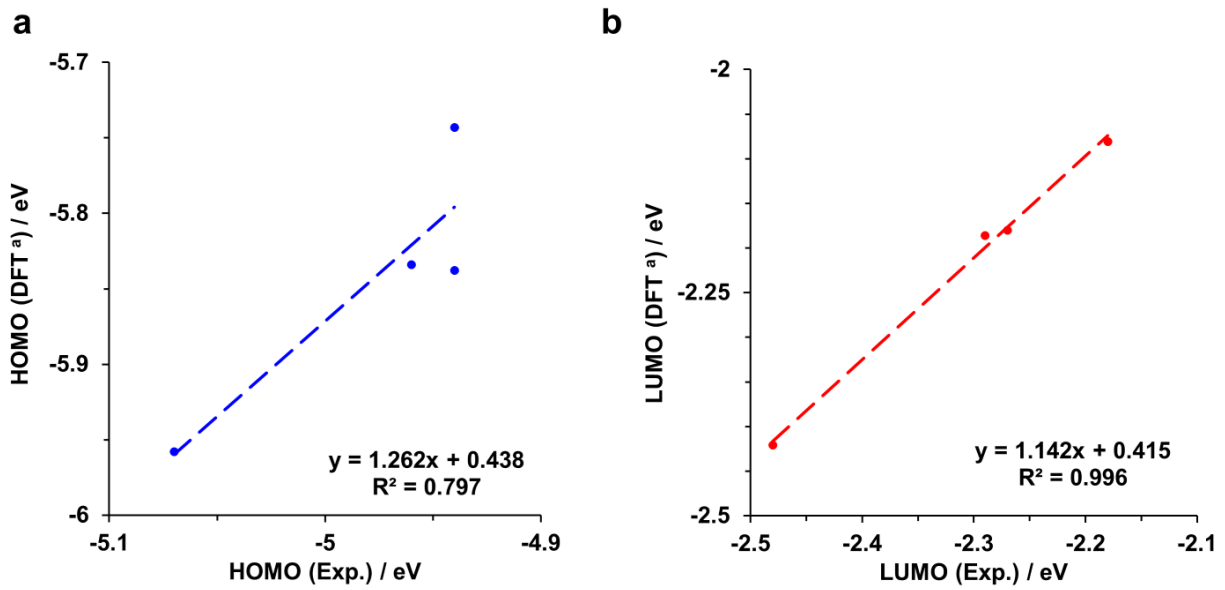

**Figure S7.** Correlation between experimentally and computationally derived (a) HOMO and (b) LUMO energies of 1-4.

**Table S3.** Select optimized structural parameters for the ground state ( $^1GS_{eq}$ ) **1-4** (RIJCOSX-rPBE0-D3(BJ)/def2-TZVP(-f)+def2/J).

| Bond / Å  | 1     | 2     | 3     | 4     |
|-----------|-------|-------|-------|-------|
| Pt–N1     | 1.984 | 2.025 | 1.978 | 1.978 |
| Pt–N2     | 2.015 | 1.998 | 1.991 | 2.012 |
| Pt–O      | 1.984 | 1.986 | 1.979 | 1.981 |
| Pt–Cl     | 2.318 | 2.319 | 2.314 | 2.314 |
| Angle / ° |       |       |       |       |
| N1–Pt–N2  | 82.2  | 81.8  | 82.7  | 82.0  |
| N1–Pt–O   | 178.5 | 173.1 | 178.5 | 176.1 |
| N1–Pt–Cl  | 94.8  | 100.6 | 95.3  | 95.2  |
| N2–Pt–O1  | 96.6  | 94.6  | 97.6  | 96.5  |
| N2–Pt–Cl  | 176.7 | 169.6 | 178.7 | 176.0 |
| O–Pt–Cl   | 86.1  | 84.1  | 84.4  | 86.6  |

**Table S4.** Select optimized structural parameters for the lowest excited triplet state of **1-4** (RIJCOSX-uPBE0-D3(BJ)/def2-TZVP(-f)+def2/J).

| Bond / Å  | 1     | 2     | 3     | 4     |
|-----------|-------|-------|-------|-------|
| Pt–N1     | 1.983 | 2.018 | 1.984 | 1.981 |
| Pt–N2     | 1.994 | 1.976 | 1.992 | 1.982 |
| Pt–O      | 1.985 | 1.987 | 1.983 | 1.986 |
| Pt–Cl     | 2.288 | 2.291 | 2.287 | 2.276 |
| Angle / ° |       |       |       |       |
| N1–Pt–N2  | 82.1  | 81.8  | 82.3  | 82.2  |
| N1–Pt–O   | 178.4 | 175.3 | 178.0 | 178.2 |
| N1–Pt–Cl  | 95.8  | 100.2 | 95.7  | 95.8  |
| N2–Pt–O1  | 96.8  | 95.0  | 96.6  | 96.5  |
| N2–Pt–Cl  | 177.5 | 168.0 | 177.6 | 176.0 |
| O–Pt–Cl   | 85.4  | 83.6  | 85.5  | 85.6  |

**Table S5.** Fragment contributions to the ground state MOs of **1**.

| MOs | $E/eV$ | Pt | Cl | HC=N | Ar <sup>phen</sup> | NAcAc | CH <sub>3</sub> |
|-----|--------|----|----|------|--------------------|-------|-----------------|
| L+4 | -0.228 | 43 | 13 | 8    | 19                 | 17    | 1               |
| L+3 | -0.254 | 10 | 3  | 7    | 62                 | 15    | 4               |
| L+2 | -1.118 | 4  | 0  | 6    | 52                 | 37    | 0               |
| L+1 | -1.534 | 3  | 0  | 7    | 69                 | 20    | 1               |
| L   | -2.186 | 2  | 0  | 28   | 51                 | 17    | 1               |
| H   | -5.834 | 18 | 9  | 1    | 23                 | 48    | 0               |
| H-1 | -6.663 | 32 | 0  | 15   | 39                 | 11    | 2               |
| H-2 | -6.851 | 39 | 32 | 1    | 14                 | 13    | 1               |
| H-3 | -6.945 | 19 | 0  | 3    | 70                 | 7     | 1               |
| H-4 | -6.966 | 59 | 21 | 2    | 10                 | 7     | 0               |

**Table S6.** Fragment contributions to the ground state MOs of **2**.

| MOs | <i>E</i> /eV | Pt | Cl | (CH <sub>3</sub> )C=N | Ar <sup>phen</sup> | NAcAc | CH <sub>3</sub> |
|-----|--------------|----|----|-----------------------|--------------------|-------|-----------------|
| L+4 | -0.191       | 9  | 2  | 8                     | 68                 | 9     | 4               |
| L+3 | -0.32        | 40 | 11 | 7                     | 13                 | 29    | 1               |
| L+2 | -1.141       | 6  | 1  | 6                     | 57                 | 30    | 0               |
| L+1 | -1.536       | 4  | 0  | 7                     | 62                 | 25    | 1               |
| L   | -2.081       | 2  | 0  | 31                    | 50                 | 15    | 1               |
| H   | -5.743       | 20 | 8  | 2                     | 23                 | 46    | 0               |
| H-1 | -6.553       | 38 | 12 | 14                    | 21                 | 14    | 1               |
| H-2 | -6.683       | 40 | 32 | 2                     | 13                 | 12    | 1               |
| H-3 | -6.83        | 12 | 10 | 5                     | 68                 | 3     | 2               |
| H-4 | -6.918       | 80 | 3  | 3                     | 8                  | 6     | 0               |

**Table S7.** Fragment contributions to the ground state MOs of **3**.

| MOs | <i>E</i> /eV | Pt | Cl | HC=N | Ar <sup>phen</sup> | NAcAc | <i>t</i> Bu |
|-----|--------------|----|----|------|--------------------|-------|-------------|
| L+4 | -0.227       | 44 | 13 | 8    | 16                 | 13    | 1           |
| L+3 | -0.259       | 8  | 2  | 7    | 65                 | 12    | 4           |
| L+2 | -1.116       | 4  | 0  | 6    | 52                 | 32    | 1           |
| L+1 | -1.535       | 3  | 0  | 6    | 68                 | 18    | 2           |
| L   | -2.18        | 2  | 0  | 29   | 50                 | 15    | 1           |
| H   | -5.838       | 19 | 9  | 1    | 23                 | 41    | 0           |
| H-1 | -6.669       | 34 | 0  | 15   | 37                 | 8     | 2           |
| H-2 | -6.855       | 39 | 32 | 1    | 16                 | 11    | 1           |
| H-3 | -6.936       | 13 | 0  | 4    | 74                 | 5     | 2           |
| H-4 | -6.965       | 65 | 20 | 2    | 6                  | 3     | 0           |

**Table S8.** Fragment contributions to the ground state MOs of **4**.

| MOs | <i>E</i> /eV | Pt | Cl | HC=N | Ar <sup>phen</sup> | NAcAc | CF <sub>3</sub> |
|-----|--------------|----|----|------|--------------------|-------|-----------------|
| L+4 | -0.293       | 50 | 15 | 8    | 6                  | 21    | 0               |
| L+3 | -0.671       | 2  | 0  | 3    | 70                 | 20    | 6               |
| L+2 | -1.27        | 5  | 1  | 8    | 51                 | 35    | 1               |
| L+1 | -1.712       | 2  | 0  | 6    | 73                 | 17    | 1               |
| L   | -2.421       | 2  | 0  | 28   | 52                 | 16    | 2               |
| H   | -5.958       | 21 | 10 | 1    | 20                 | 47    | 0               |
| H-1 | -6.808       | 46 | 4  | 11   | 21                 | 18    | 0               |
| H-2 | -6.947       | 38 | 35 | 2    | 13                 | 12    | 0               |
| H-3 | -7.057       | 78 | 7  | 2    | 4                  | 7     | 0               |
| H-4 | -7.115       | 40 | 39 | 4    | 9                  | 7     | 0               |

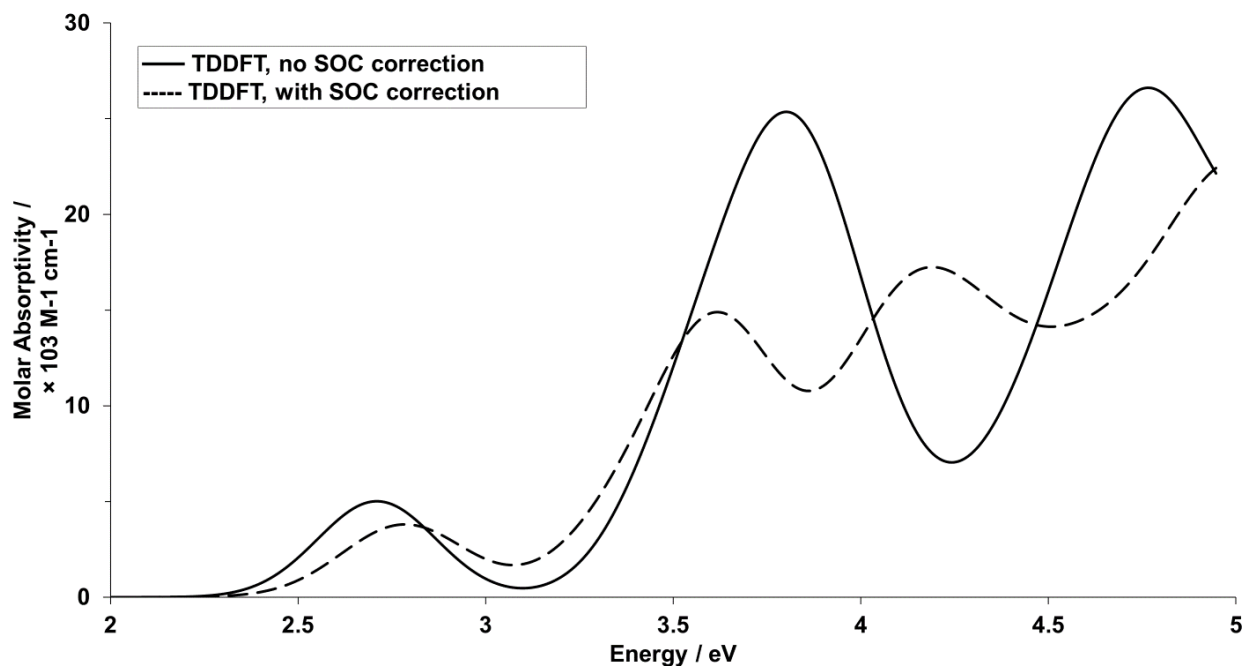

**Figure S8.** Effects of inclusion of spin-orbit coupling on the calculated UV-Vis absorption spectra of **4**.

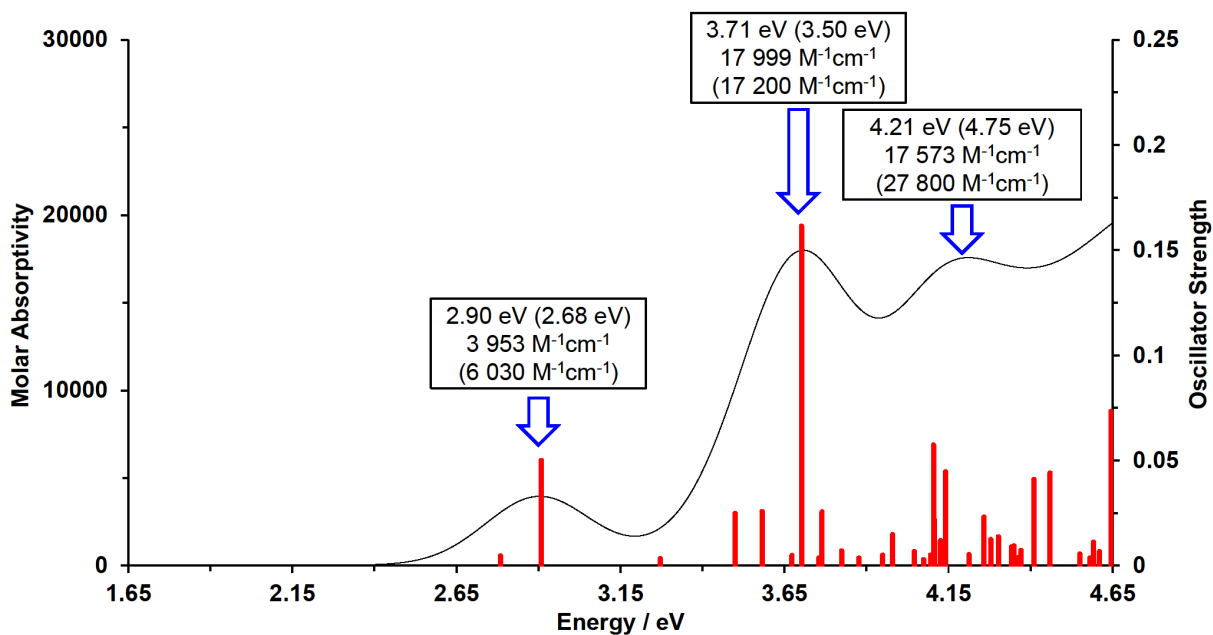

**Figure S9.** TDDFT simulated SOC-corrected spectrum (—), vertical excitations (—), and oscillator strengths of **1** in  $CH_2Cl_2$ . Calculated energies and molar absorptivities ( $M^{-1}cm^{-1}$ ) at each peak maxima are shown with experimental (in parentheses).

**Table S9.** Spin-only and SOC-corrected TDDFT predicted singlet-singlet, singlet-triplet, and singlet-SOC vertical excitation energies ( $f > 0.003$ ), MO contributions (>10%), singlet/triplet contributions (>5 %) for **1**. Entries in red reflect SOC calculated transitions which appear in valley regions of the absorption spectrum.

| $^1S_n$ | E/eV | $f_{osc}$ | MO contributions (> 10%)                                        |                                       |
|---------|------|-----------|-----------------------------------------------------------------|---------------------------------------|
| 1       | 2.82 | 0.069     | H->L (97%)                                                      |                                       |
| 2       | 3.52 | 0.047     | H->L+1(75%), H-1->L (12%)                                       |                                       |
| 3       | 3.71 | 0.088     | H-1->L (43%), H-2->L (40%)                                      |                                       |
| 4       | 3.72 | 0.025     | H-2->L (35%), H-4->L (34%), H-1->L (13%)                        |                                       |
| 5       | 3.77 | 0.011     | H-4->L (28%), H-3->L (19%), H->L+2 (15%),<br>H-2->L (12%)       |                                       |
| $^3T_n$ | E/eV | $f_{osc}$ | MO contributions (> 10%)                                        |                                       |
| 1       | 2.21 | 0.000     | H->L (65%), H->L+1 (12%)                                        |                                       |
| 2       | 2.67 | 0.000     | H-1->L (61%)                                                    |                                       |
| 3       | 3.08 | 0.000     | H->L+1 (45%), H->L (26%), H->L+2 (13%)                          |                                       |
| 4       | 3.23 | 0.000     | H-3->L (30%), H->L+2 (20%)                                      |                                       |
| 5       | 3.32 | 0.000     | H->L+4 (41%), H-2->L+4 (13%), H->L+3 (11%),<br>H-3->L (10%)     |                                       |
| 6       | 3.43 | 0.000     | H-1->L (19%), H-3->L (18%), H-3->L+1 (18%),<br>H->L+2 (14%)     |                                       |
| 7       | 3.50 | 0.000     | H-3->L (19%), H-1->L+1 (18%), H->L+2 (12%)                      |                                       |
| 8       | 3.56 | 0.000     | H-2->L (64%)                                                    |                                       |
| 9       | 3.68 | 0.000     | H-4->L (61%), H-5->L (11%), H-3->L (10%)                        |                                       |
| 10      | 3.72 | 0.000     | H-1->L+2 (25%), H-3->L+1 (17%), H->L+2 (10%)                    |                                       |
| 11      | 3.80 | 0.000     | H-4->L+4 (22%), H-1->L+4 (16%), H-3->L+4 (11%),<br>H-4->L (10%) |                                       |
| SOC     | E/eV | $f_{osc}$ | $^1S_n$ contributions (> 5%)                                    | $^3T_n$ contributions (> 5%)          |
| 4       | 2.79 | 0.005     | 1 (6%)                                                          | 2 (90%)                               |
| 7       | 2.91 | 0.050     | 1 (85%)                                                         | 2 (5%), 9 (6%)                        |
| 13      | 3.27 | 0.003     | 4 (31%), 5 (38%)                                                | 3 (11%)                               |
| 20      | 3.50 | 0.025     | 2 (18%), 3 (18%)                                                | 6 (8%), 9 (25%), 11 (9%)              |
| 24      | 3.58 | 0.026     | 2 (16%), 3 (17%), 5 (10%)                                       | 6 (8%), 9 (13%), 11 (6%),<br>12 (6%)  |
| 28      | 3.68 | 0.005     | -                                                               | 7 (62%), 10 (7%), 12 (8%),<br>13 (8%) |
| 30      | 3.70 | 0.161     | 2 (14%), 4 (13%), 6 (10%)                                       | 7 (5%), 9 (16%), 10 (5%),<br>11 (5%)  |



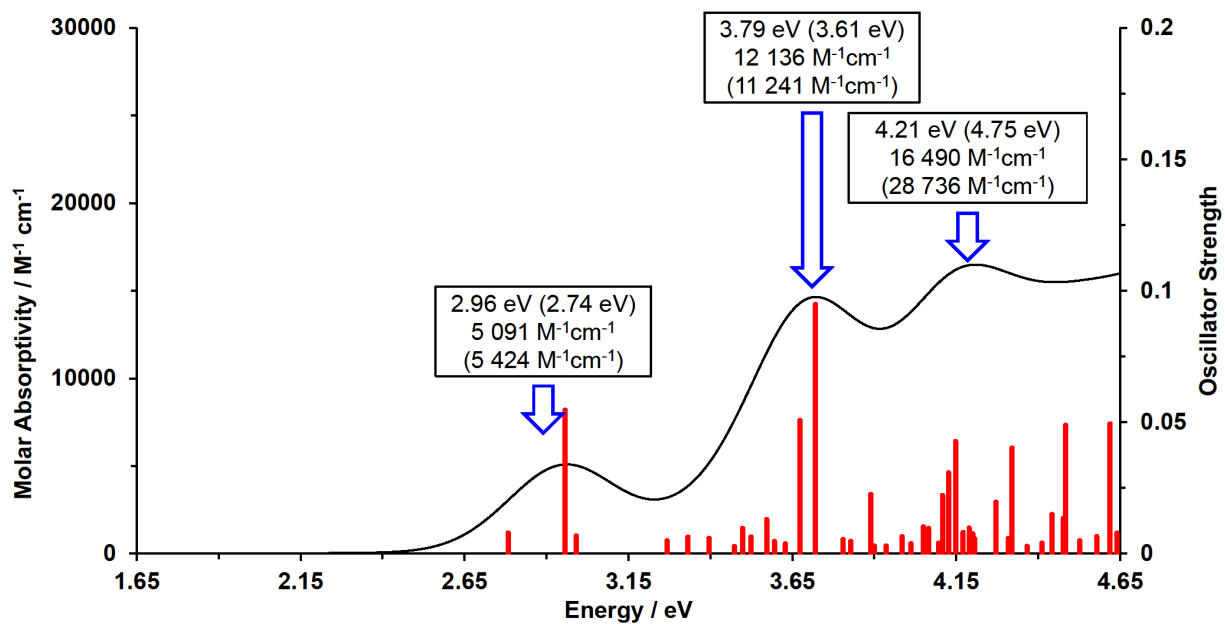

**Figure S10.** TDDFT simulated SOC-corrected spectrum (—), vertical excitations (—), and oscillator strengths of **2** in CH<sub>2</sub>Cl<sub>2</sub>. Calculated energies and molar absorptivities (M<sup>-1</sup> cm<sup>-1</sup>) at each peak maxima are shown with experimental (in parentheses).

**Table S10.** Spin-only and SOC-corrected TDDFT predicted singlet-singlet, singlet-triplet, and singlet-SOC vertical excitation energies ( $f > 0.003$ ), MO contributions (>10%) and singlet/triplet contributions (>5 %) for **2**. Entries in red reflect SOC calculated transitions which appear in valley regions of the absorption spectrum.

| $^1S_n$ | E/eV | $f_{osc}$ | MO contributions (> 10%)                                        |
|---------|------|-----------|-----------------------------------------------------------------|
| 1       | 2.84 | 0.078     | H->L (97%)                                                      |
| 2       | 3.36 | 0.067     | H->L+1 (67%), H->L+2 (12%)                                      |
| 3       | 3.63 | 0.048     | H-1->L (44%), H->L+2 (22%), H->L+1 (15%)                        |
| 4       | 3.64 | 0.018     | H-2->L (27%), H-1->L (19%), H->L+2 (19%), H->L+3 (11%)          |
| 5       | 3.71 | 0.045     | H-2->L (66%), H-1->L (18%)                                      |
| 6       | 3.81 | 0.031     | H-4->L (67%), H-3->L (22%)                                      |
| 7       | 3.89 | 0.026     | H-L+3 (23%), H-1->L+1 (18%), H-4->L (17%), H-3->L (10%)         |
| 8       | 3.98 | 0.061     | H-3->L (25%), H->L+2 (16%), H-5->L (14%)                        |
| 9       | 4.02 | 0.053     | H-5->L (49%)                                                    |
| 10      | 4.07 | 0.095     | H-5->L (23%), H->L+2 (15%), H->L+3 (15%),<br>H-1->L+1 (14%)     |
| 11      | 4.08 | 0.007     | H-2->L+1 (17%), H-4->L+1 (16%)                                  |
| $^3T_n$ | E/eV | $f_{osc}$ | MO contributions (> 10%)                                        |
| 1       | 2.20 | 0.000     | H->L (62%), H->L+1 (17%)                                        |
| 2       | 2.68 | 0.000     | H-1->L (38%), H->L+1 (20%), H->L+2 (13%)                        |
| 3       | 2.98 | 0.000     | H->L (25%), H->L+1 (17%), H-1->L (11%)                          |
| 4       | 3.16 | 0.000     | H->L+1 (21%), H->L+3 (17%), H->L+2 (13%)                        |
| 5       | 3.24 | 0.000     | H->L+3 (26%), H-3->L (21%), H->L+2 (10%)                        |
| 6       | 3.40 | 0.000     | H-1->L+1 (23%), H-1->L (20%), H-3->L+2 (12%),<br>H-1->L+3 (10%) |
| 7       | 3.46 | 0.000     | H-3->L (47%), H->L+2 (14%)                                      |
| 8       | 3.48 | 0.000     | H-3->L+1 (18%), H-1->L+2 (15%), H-1->L+3 (14%),<br>H-2->L (10%) |
| 9       | 3.51 | 0.000     | H-2->L (42%), H->L+2 (12%)                                      |
| 10      | 3.61 | 0.000     | H-4->L+3 (37%), H-4->L+2 (16%), H-4->L+1 (13%)                  |
| 11      | 3.70 | 0.000     | H-4->L (26%), H-2->L (6%)                                       |
| 12      | 3.71 | 0.000     | H-2->L+3 (13%), H-5->L+3 (12%)                                  |
| 13      | 3.81 | 0.000     | H-4->L (50%)                                                    |
| 14      | 3.86 | 0.000     | H-5->L (51%)                                                    |
| 15      | 3.99 | 0.000     | H-1->L+1 (30%), H-1->L+3 (13%), H-7->L (11%)                    |
| 16      | 4.10 | 0.000     | H-2->L+1 (49%)                                                  |

| SOC | E/eV | $f_{osc}$ | Singlet contributions (> 5%) | Triplet contributions (> 5%)                |
|-----|------|-----------|------------------------------|---------------------------------------------|
| 4   | 2.79 | 0.008     | 1 (11%)                      | 2 (82%)                                     |
| 7   | 2.96 | 0.055     | 1 (64%)                      | 2 (12%), 3 (11%)                            |
| 9   | 2.99 | 0.007     | 1 (10%)                      | 2 (5%), 3 (56%), 6 (9%)                     |
| 14  | 3.27 | 0.005     | 2 (13%)                      | 4 (19%), 5 (8%), 6 (16%), 8% (10%), 12 (8%) |
| 16  | 3.33 | 0.006     | 2 (24%)                      | 6 (7%), 8 (5%), 9(5%), 10(33%), 12(9%)      |
| 19  | 3.40 | 0.006     | 6 (5%)                       | 4 (10%), 5 (25%), 6 (18%), 8 (%), 10 (7%)   |
| 21  | 3.48 | 0.003     | -                            | 7 (30%), 11 (13%), 12 (5%), 13 (7%)         |
| 23  | 3.50 | 0.010     | 4 (9%)                       | 7 (33%), 13 (8%)                            |
| 24  | 3.53 | 0.006     | 6 (6%)                       | 9 (30%), 10 (14%), 11 (9%)                  |
| 27  | 3.57 | 0.013     | 4 (14%)                      | 6 (26%), 8 (18%), 9 (8%)                    |
| 28  | 3.60 | 0.005     | 12 (11%)                     | 6 (3%), 10 (16%), 12 (25%)                  |
| 31  | 3.63 | 0.004     | -                            | 6 (15%), 7 (32%), 8 (16%), 9 (17%)          |
| 32  | 3.68 | 0.051     | 2 (17%), 3 (31%), 4 (8%)     | 12 (8%)                                     |
| 33  | 3.72 | 0.095     | 3 (6%), 5 (34%)              | 7 (7%), 11 (8%), 13 (14%)                   |

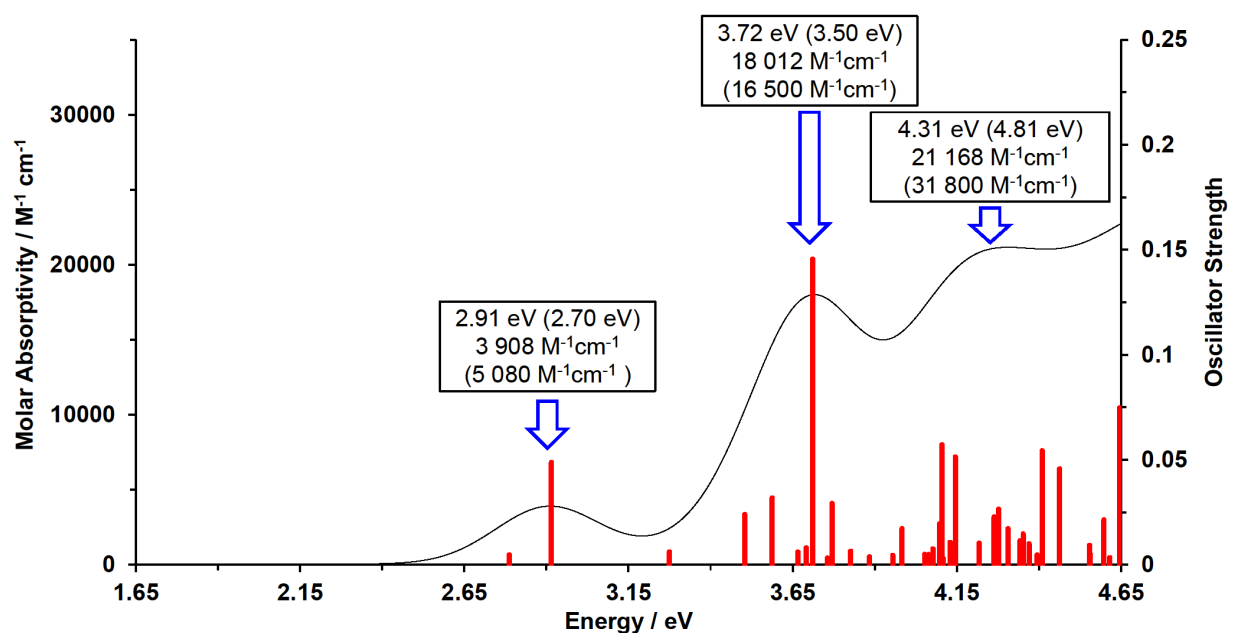

**Figure S11.** TDDFT simulated SOC-corrected spectrum (—), vertical excitations (—), and oscillator strengths of **3** in  $CH_2Cl_2$ . Calculated energies and molar absorptivities ( $M^{-1}cm^{-1}$ ) at each peak maxima are shown with experimental (in parentheses).

**Table S11.** Spin-only and SOC-corrected TDDFT predicted singlet-singlet, singlet-triplet, and singlet-SOC vertical excitation energies ( $f > 0.003$ ), MO contributions (>10%), singlet/triplet contributions (>5 %) for **3**. Entries in **red** reflect SOC calculated transitions which appear in valley regions of the absorption spectrum.

| $^1S_n$   | E/eV        | $f_{osc}$    | MO contributions (> 10%)                                             |                                    |
|-----------|-------------|--------------|----------------------------------------------------------------------|------------------------------------|
| 1         | 2.82        | 0.065        | H->L (97%)                                                           |                                    |
| 2         | 3.52        | 0.051        | H->L+1 (75%), H-3->L (12%)                                           |                                    |
| 3         | 3.71        | 0.080        | H-1->L (44%), H-2->L (40%)                                           |                                    |
| 4         | 3.73        | 0.024        | H-4->L (44%), H-2->L (29%), H-1->L (11%)                             |                                    |
| 5         | 3.78        | 0.012        | H-4->L (27%), H->L+2 (18%), H-3->L (15%), H-2->L (14%)               |                                    |
| 6         | 3.86        | 0.177        | H-2->L (23%), H-2->L (15%), H-1->L (14%), H-4->L (12%), H->L+2 (12%) |                                    |
| 7         | 3.87        | 0.003        | H-5->L (83%), H-4->L (14%)                                           |                                    |
| 8         | 3.95        | 0.072        | H-3->L (28%), H->L+4 (24%)                                           |                                    |
| 9         | 4.04        | 0.125        | H->L+2 (42%), H->L+4 (30%)                                           |                                    |
| $^3T_n$   | E/eV        | $f_{osc}$    | MO contributions (> 10%)                                             |                                    |
| 1         | 2.23        | 0.000        | H->L (64%), H->L+1 (14%)                                             |                                    |
| 2         | 2.68        | 0.000        | H-1->L (61%)                                                         |                                    |
| 3         | 3.07        | 0.000        | H->L+1 (45%), H->L (27%), H->L+2 (13%)                               |                                    |
| 4         | 3.23        | 0.000        | H-3->L (33%), H->L+2 (20%)                                           |                                    |
| 5         | 3.33        | 0.000        | H->L+4 (44%), H-2->L+4 (14%), H-3->L (11%)                           |                                    |
| 6         | 3.43        | 0.000        | H-3->L (22%), H-1->L (19%), H-3->L (18%), H->L+2 (15%)               |                                    |
| 7         | 3.52        | 0.000        | H-1->L+1 (21%), H-3->L (17%), H->L+2 (12%), H-3->L+2 (10%)           |                                    |
| 8         | 3.57        | 0.000        | H-2->L (67%)                                                         |                                    |
| 9         | 3.68        | 0.000        | H-4->L (67%), H-5->L (11%)                                           |                                    |
| 10        | 3.73        | 0.000        | H-1->L+2 (25%), H-3->L+1 (18%), H->L+2 (11%)                         |                                    |
| 11        | 3.81        | 0.000        | H-5->L (71%)                                                         |                                    |
| 12        | 3.89        | 0.000        | H-4->L+4 (32%), H-1->L+4 (15%), H-4->L (11%)                         |                                    |
| 13        | 3.91        | 0.000        | H-1->L+4 (24%), H-4->L+4 (16%), H-2->L+4 (15%)                       |                                    |
| 14        | 4.04        | 0.000        | H-1->L+1 (30%), H-1->L+3 (12%), H-8->L (11%)                         |                                    |
| 15        | 4.06        | 0.000        | H-5->L+4 (47%)                                                       |                                    |
| SOC       | E/eV        | $f_{osc}$    | Singlet contributions (> 5%)                                         | Triplet contributions (> 5%)       |
| 4         | 2.79        | 0.005        | 1 (6%)                                                               | 2 (90%)                            |
| 7         | 2.92        | 0.049        | 1 (85%)                                                              | 2 (6%), 9 (6%)                     |
| <b>13</b> | <b>3.28</b> | <b>0.006</b> | <b>1 (85%)</b>                                                       | <b>3 (9%), 4 (29%), 5 (40%),</b>   |
| 20        | 3.51        | 0.024        | 2 (19%), 3 (19%)                                                     | 6 (7%), 9 (26%), 11 (8%)           |
| 24        | 3.59        | 0.032        | 2 (18%), 3 (19%), 5 (11%)                                            | 6 (6%), 9 (12%), 11 (6%)           |
| 27        | 3.67        | 0.006        | -                                                                    | 7 (80%)                            |
| 28        | 3.69        | 0.008        | -                                                                    | 7 (74%), 10 (5%), 12 (6%), 13 (6%) |
| 30        | 3.71        | 0.146        | 2 (12%), 4 (11%), 5 (8%), 6 (10%)                                    | 7 (12%), 9 (16%), 10 (5%), 11 (5%) |

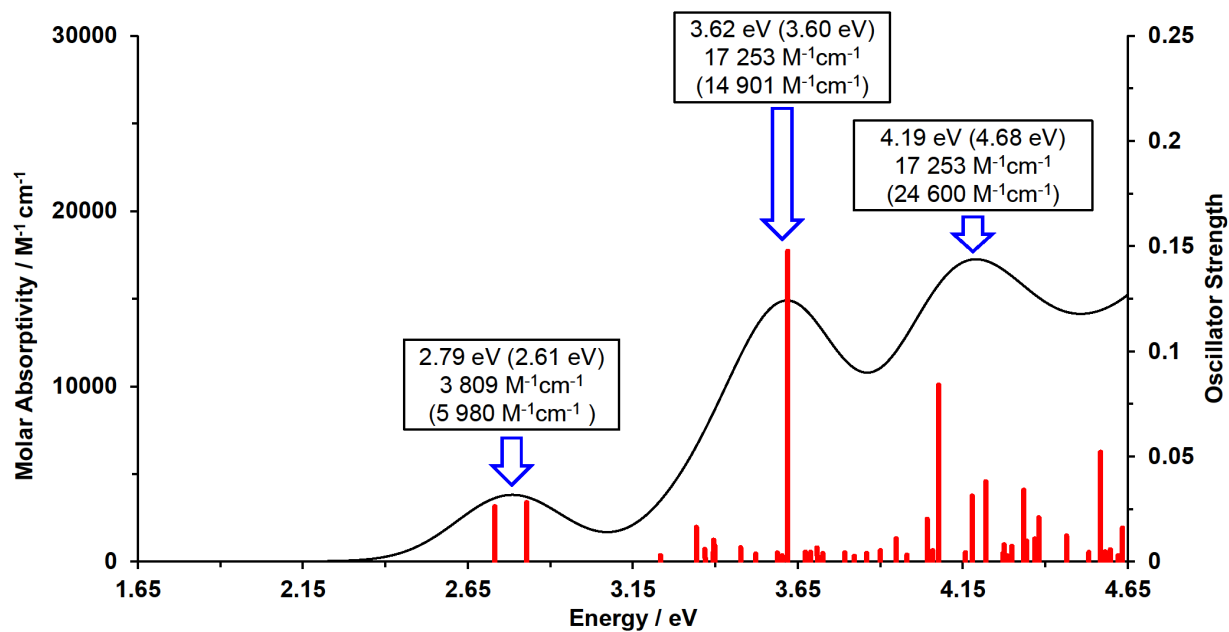

**Figure S12.** TDDFT simulated SOC-corrected spectrum (—), vertical excitations (—), and oscillator strengths of **4** in  $CH_2Cl_2$ . Calculated energies and molar absorptivities ( $M^{-1}cm^{-1}$ ) at each peak maxima are shown with experimental (in parentheses).

**Table S12.** Spin-only and SOC-corrected TDDFT predicted singlet-singlet, singlet-triplet, and singlet-SOC vertical excitation energies ( $f > 0.003$ ), MO contributions (>10%), singlet/triplet contributions (>5 %) for **4**. Entries in red reflect SOC calculated transitions which appear in valley regions of the absorption spectrum.

| $^1S_n$ | E/eV | $f_{osc}$ | MO contributions (> 10%)                                  |
|---------|------|-----------|-----------------------------------------------------------|
| 1       | 2.71 | 0.069     | H->L (97%)                                                |
| 2       | 3.46 | 0.026     | H->L+1 (67%), H-1->L (17%)                                |
| 3       | 3.55 | 0.066     | H-1->L (53%), H->L+1 (16%), H-2->L (16%),<br>H-3->L (11%) |
| 4       | 3.59 | 0.002     | H-3->L (52%), H-2->L (45%)                                |
| 5       | 3.67 | 0.080     | H-4->L (30%), H-2->L (24%), H-3->L (18%),<br>H-1->L (11%) |
| 6       | 3.76 | 0.010     | H->L+2 (46%), H-4->L (28%), H->L+4 (12%)                  |
| 7       | 3.82 | 0.196     | H-4->L (37%), H-3->L (13%), H-2->L (12%),<br>H->L+2 (11%) |
| 8       | 3.91 | 0.067     | H-5->L (55%), H-1->L+1 (10%)                              |
| 9       | 4.06 | 0.058     | H->L+4 (55%), H->L+2 (24%)                                |
| $^3T_n$ | E/eV | $f_{osc}$ | MO contributions (> 10%)                                  |
| 1       | 2.17 | 0.000     | H->L (69%)                                                |
| 2       | 2.68 | 0.000     | H-1->L (55%)                                              |
| 3       | 2.99 | 0.000     | H->L+1 (51%), H->L (22%)                                  |
| 4       | 3.2  | 0.000     | H-5->L (32%), H->L+2 (23%)                                |
| 5       | 3.32 | 0.000     | H->L+4 (36%), H-5->L (26%)                                |
| 6       | 3.4  | 0.000     | H->L+2 (24%), H-5->L+1 (16%), H-2->L (14%), H-5->L (13%)  |
| 7       | 3.42 | 0.000     | H-2->L (24%), H-1->L (18%)                                |
| 8       | 3.52 | 0.000     | H-3->L (49%)                                              |
| 9       | 3.59 | 0.000     | H-3->L (34%), H-5->L (13%)                                |
| 10      | 3.62 | 0.000     | H-4->L (48%), H-2->L (24%)                                |
| 11      | 3.71 | 0.000     | H-1->L+2 (23%), H-4->L (17%), H-5->L+1 (17%)              |
| 12      | 3.86 | 0.000     | H-1->L+4 (33%), H-3->L+4 (26%)                            |
| 13      | 3.91 | 0.000     | H-3->L+4 (35%), H-1->L+4 (20%)                            |
| 14      | 3.99 | 0.000     | H-1->L+1 (37%)                                            |
| 15      | 4.04 | 0.000     | H-4->L+4 (34%), H-2->L+4 (22%)                            |
| 16      | 4.09 | 0.000     | H-2->L+1 (22%)                                            |

| SOC | E/eV | $f_{osc}$ | Singlet contributions (> 5%)         | Triplet contributions (> 5%)                        |
|-----|------|-----------|--------------------------------------|-----------------------------------------------------|
| 4   | 2.73 | 0.026     | 1 (41%)                              | 2 (53%)                                             |
| 7   | 2.83 | 0.028     | 1 (49%)                              | 2 (40%), 8 (6%)                                     |
| 13  | 3.24 | 0.003     |                                      | 4 (41%), 5 (30%)                                    |
| 14  | 3.34 | 0.016     | 2 (15%), 3 (21%)                     | 6 (7%), 7 (15%),<br>8 (17%), 10 (5%)                |
| 16  | 3.37 | 0.006     | 2 (5%), 5 (5%)                       | 7 (47%), 8 (14%),<br>9 (6%), 10 (5%)                |
| 18  | 3.40 | 0.004     | -                                    | 4 (44%), 5 (37%),<br>7 (8%)                         |
| 19  | 3.40 | 0.010     | -                                    | 4 (28%), 5 (38%),<br>7 (13%)                        |
| 20  | 3.40 | 0.008     | -                                    | 4 (38%), 5 (35%)                                    |
| 23  | 3.48 | 0.007     | -                                    | 6 (62%), 7 (9%),<br>8 (5%)                          |
| 24  | 3.53 | 0.004     | 2 (22%), 3 (18%),<br>6 (8%)          | 6 (8%), 8 (13%),<br>10 (5%)                         |
| 25  | 3.59 | 0.004     | -                                    | 9 (8%), 11 (16%),<br>12 (25%), 13 (22%),<br>15 (9%) |
| 26  | 3.60 | 0.003     | 2 (6%)                               | 9 (9%), 11 (19%),<br>12 (22%) 13 (18%)              |
| 27  | 3.62 | 0.148     | 2 (18%), 4 (7%),<br>5 (11%), 7 (10%) | 8 (10%), 9 (9%),<br>10 (6%)                         |

## Excited State Dynamics of 4

The excited state dynamics of **4** were explored using the ESD module implemented in Orca v. 4.2.1.<sup>2,3</sup> The average rates of ISC (5) and phosphorescence (6) were estimated using the following equations:

$$k^{ISC,aver.} = k^{ISC,-1} + k^{ISC,0} + k^{ISC,+1} \quad (5)$$

$$k^{Phos,aver.} = \frac{k_1 + k_2 e^{-\left(\frac{\Delta E_{1,2}}{k_B T}\right)} + k_3 e^{-\left(\frac{\Delta E_{1,3}}{k_B T}\right)}}{1 + e^{-\left(\frac{\Delta E_{1,2}}{k_B T}\right)} + e^{-\left(\frac{\Delta E_{1,3}}{k_B T}\right)}} \quad (6)$$

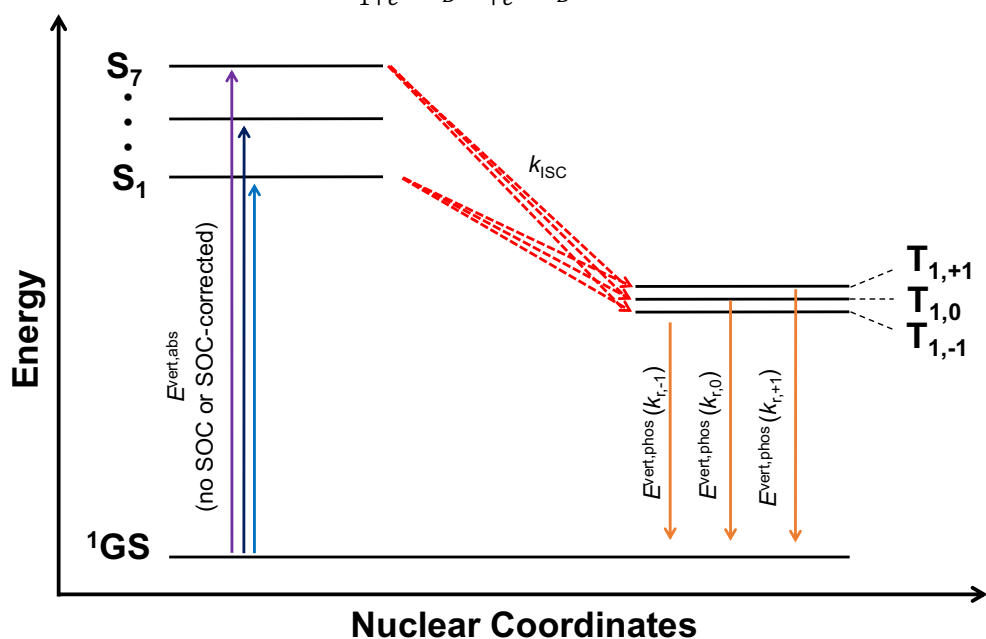

**Figure S13.** Schematic of photophysical processes and calculated parameters.

**Table S13.** Calculated rate of intersystem crossing from  $^1S_1(^1GS_{eq})$  and  $^1S_7(^1GS_{eq})$  to the three substates of  $^3T_{1,eq}$  ( $M_S = -1, 0, +1$ ) for **4** at 298 K and 77 K in  $CH_2Cl_2$ .

| Temp / K                                         | $k_1 / s^{-1}$<br>$M_S = -1$ | $k_2 / s^{-1}$<br>$M_S = 0$ | $k_3 / s^{-1}$<br>$M_S = +1$ | $k_{aver.} / s^{-1}$   |
|--------------------------------------------------|------------------------------|-----------------------------|------------------------------|------------------------|
| $S_1(^1GS_{eq}) \rightarrow T_{1,M_S}(T_{1,eq})$ | $3.845 \times 10^{12}$       | 0                           | $2.317 \times 10^{13}$       | $8.870 \times 10^{12}$ |
| $S_7(^1GS_{eq}) \rightarrow T_{1,M_S}(T_{1,eq})$ | $2.928 \times 10^{13}$       | 0                           | 0                            | $1.020 \times 10^{13}$ |

**Table S14.** Calculated phosphorescence parameters for **4** at 298 K and 77 K in  $CH_2Cl_2$ .

| Temp / K | $k_1 / s^{-1}$ | $k_2 / s^{-1}$ | $k_3 / s^{-1}$ | $k_{aver.} / s^{-1}$ |
|----------|----------------|----------------|----------------|----------------------|
| 298      | 36 631         | 57 303         | 77 508         | 56 777               |
| 77       | 29 492         | 52 137         | 72 632         | 49 973               |



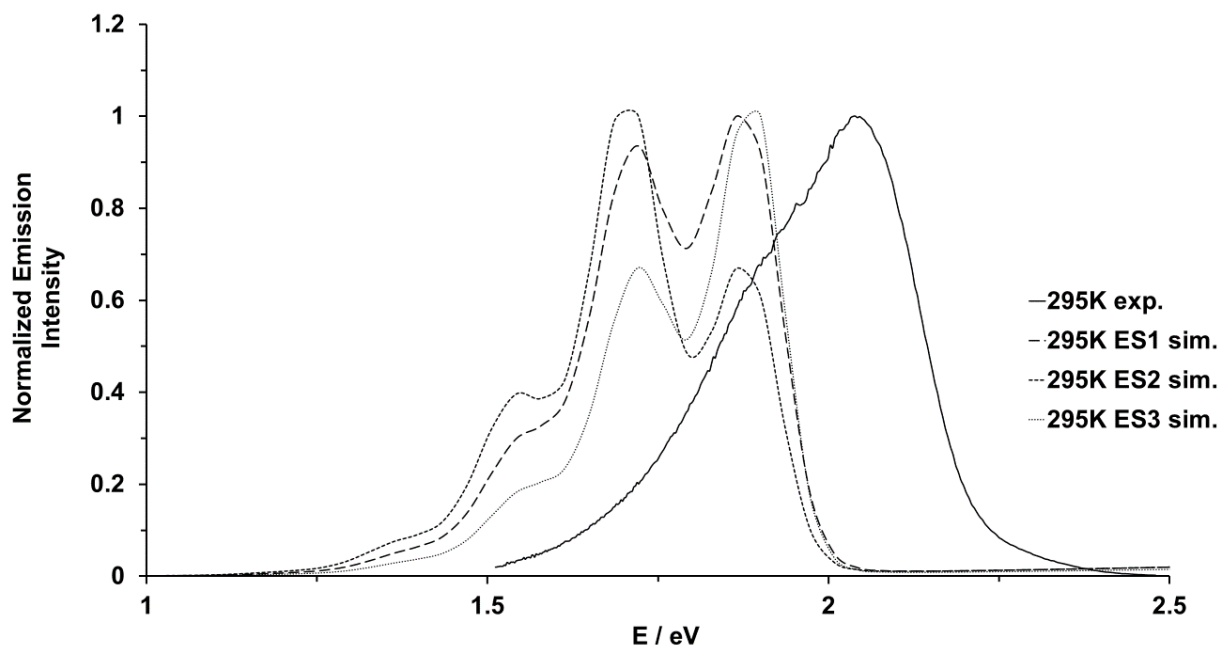

**Figure S14.** TDDFT simulated (FWHM = 3000  $\text{cm}^{-1}$ ,  $T = 298 \text{ K}$ ) and experimental ( $T = 295 \text{ K}$ ) phosphorescence spectra of **4** in  $\text{CH}_2\text{Cl}_2$ . The three substates ( $M_S = -1, 0, +1$ ) of the lowest excited triplet state are considered.

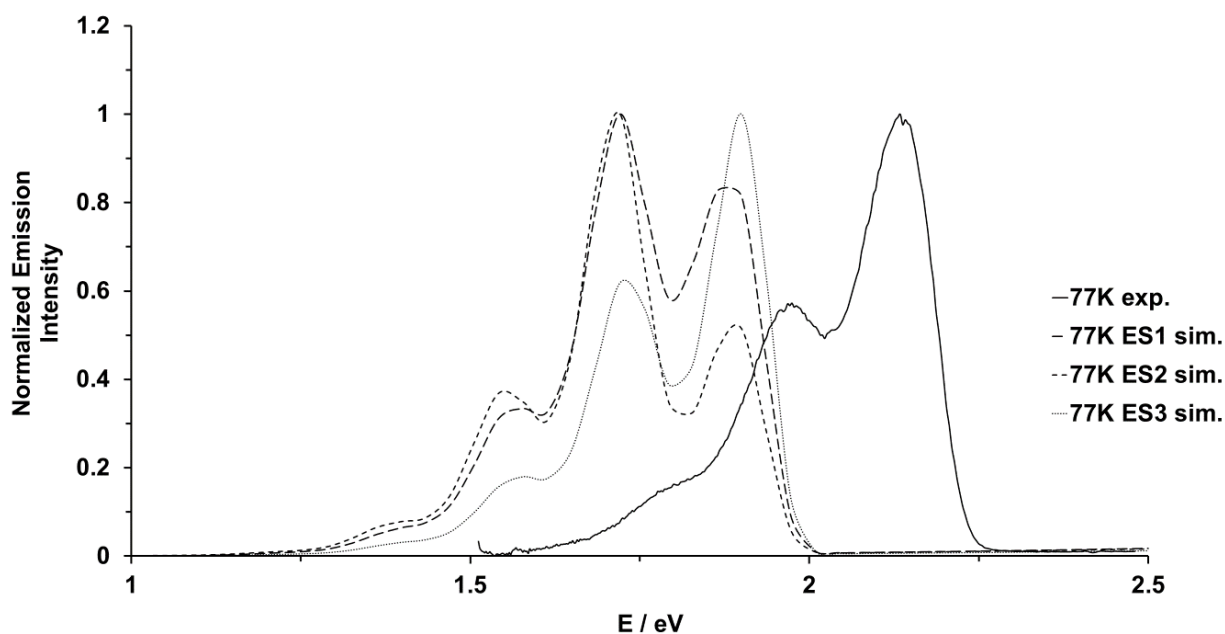

**Figure S15.** TDDFT simulated (FWHM = 3000  $\text{cm}^{-1}$ ,  $\text{CH}_2\text{Cl}_2$ ) and experimental phosphorescence spectra of **4** at 77 K. The three substates ( $M_S = -1, 0, +1$ ) of the lowest excited triplet state are considered.

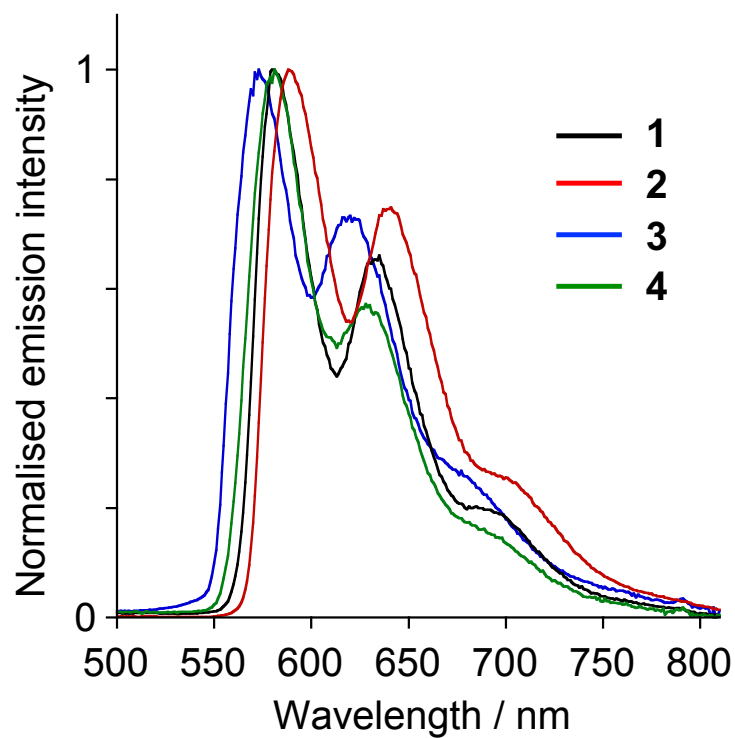

**Figure S16.** Stackplot of emission spectra of **1-4** in EPA (diethyl ether / isopentane /ethanol 2:2:1 v/v) at 77 K.

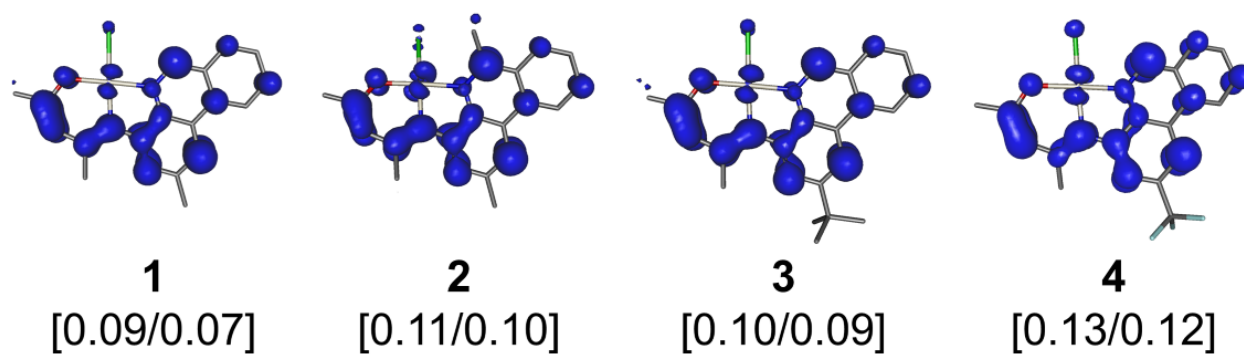

**Figure S17.** Spin density maps (isovalue = 0.004) of **1-4** at the equilibrium geometries of the lowest-lying excited triplet state. Shown in square brackets are the Löwdin/Mulliken spin densities on Pt.

## NMR and HRMS Figures

IBML-10-052b5H.1.fid — RXN-10-052 Pt(MeNNO)Cl — PROTON CDCl<sub>3</sub> C:\Herbert 1

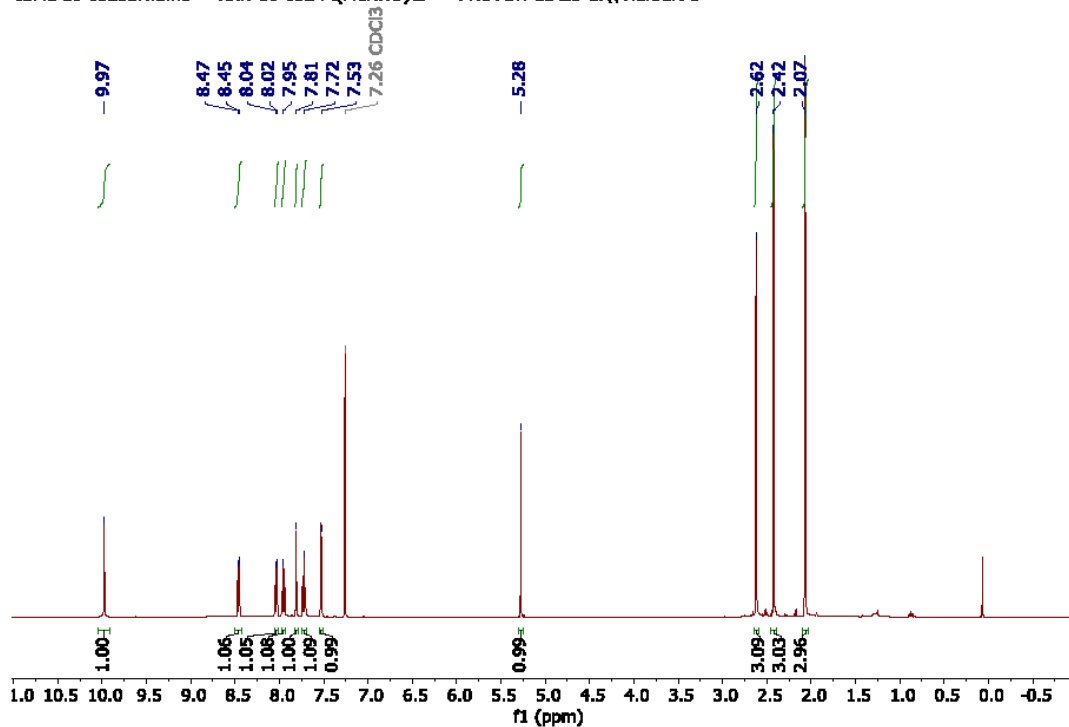

Figure S18. <sup>1</sup>H NMR (500 MHz, 25 °C) spectrum of **1** in CDCl<sub>3</sub>.

IBML-10-052b5C.1.fid — RXN-10-052 Pt(MeNNO)Cl — C13CPD CDCl<sub>3</sub> C:\Herbert 1

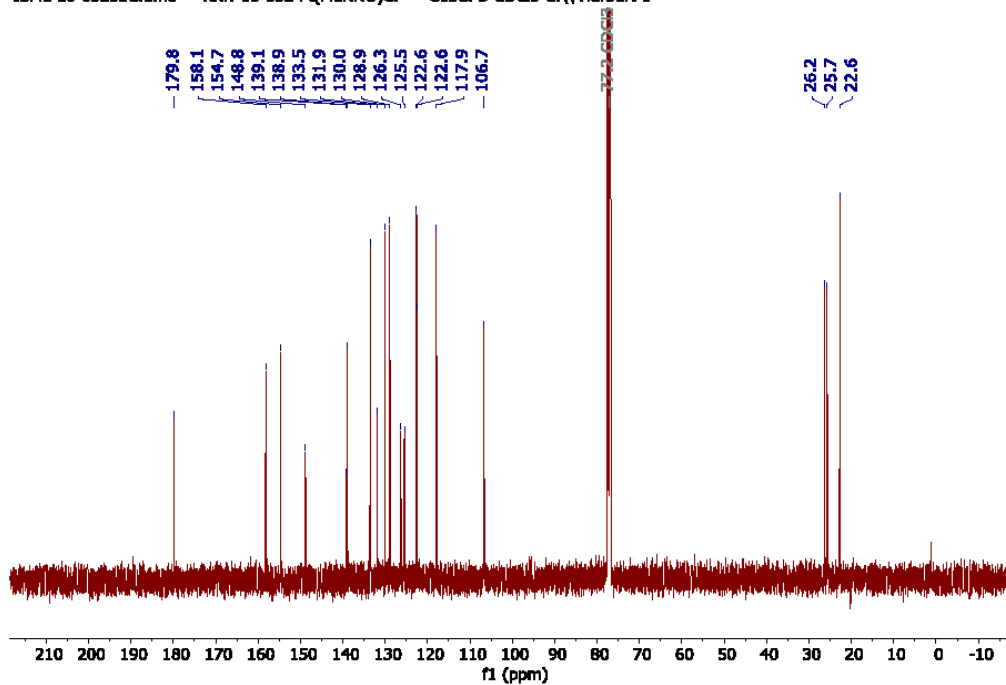

**Figure S19.**  $^{13}\text{C}\{^1\text{H}\}$  NMR (125 MHz, 25 °C) spectrum of **1** in  $\text{CDCl}_3$ .

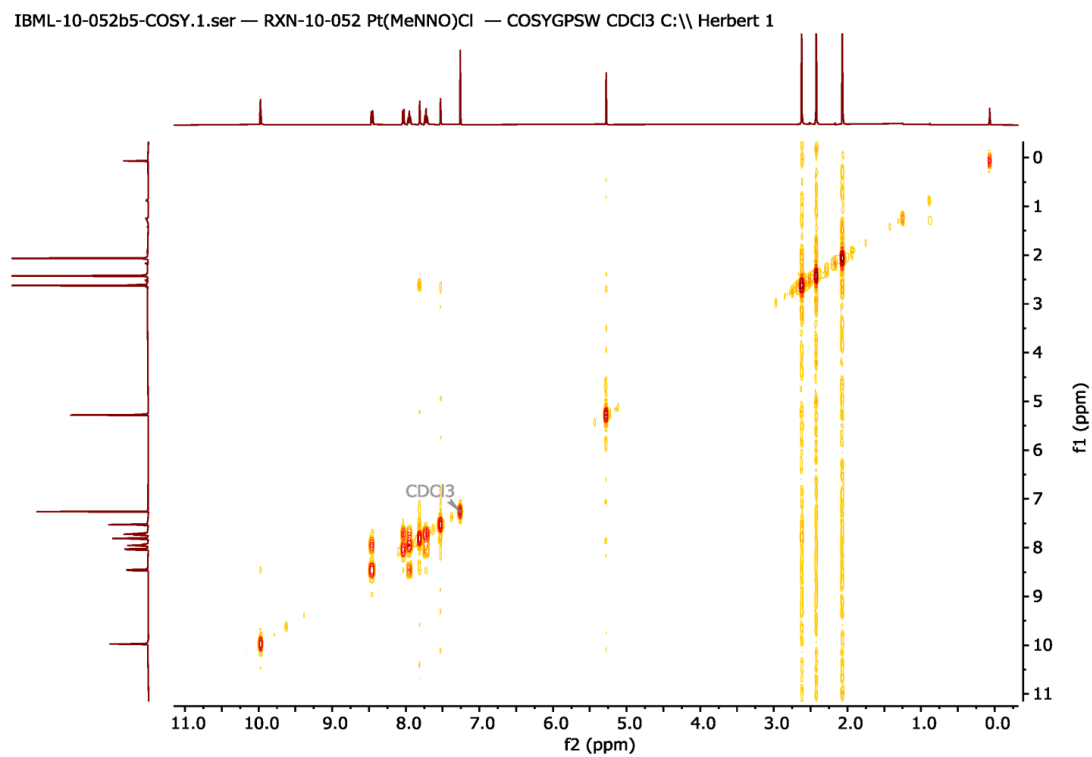

**Figure S20.**  $^1\text{H}$ - $^1\text{H}$  COSY spectrum of **1** in  $\text{CDCl}_3$ .

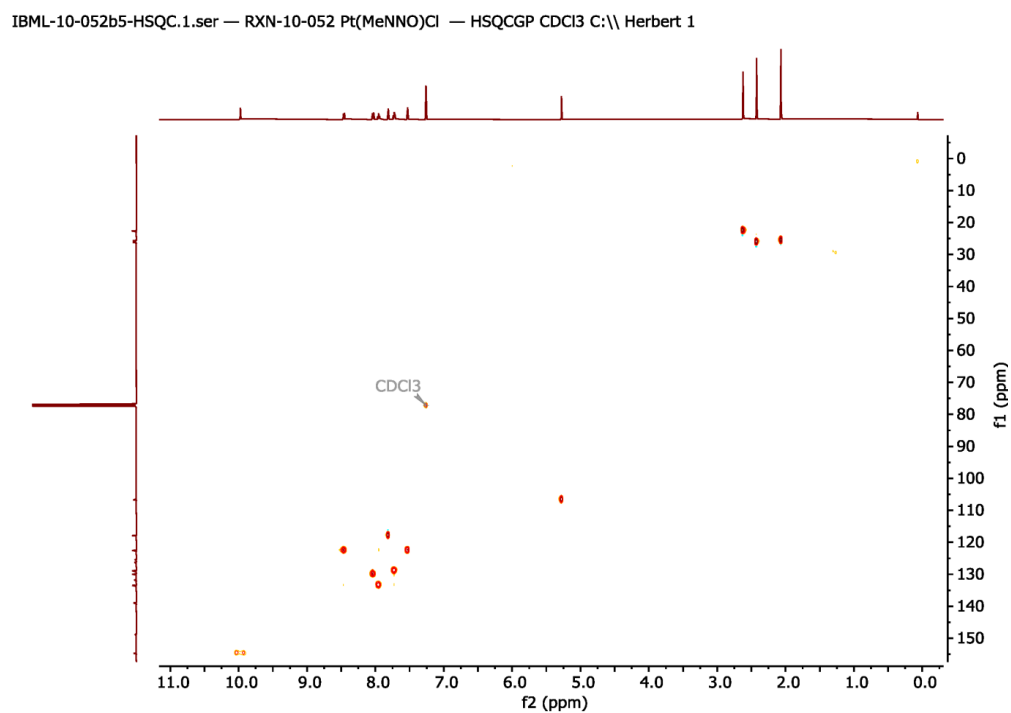

**Figure S21.** HSQC spectrum of **1** in CDCl<sub>3</sub>.

IBML-10-052b5-HMBC.1.ser — RXN-10-052 Pt(MeNNO)Cl — HMBCGPND CDCl3 C:\ Herbert 1

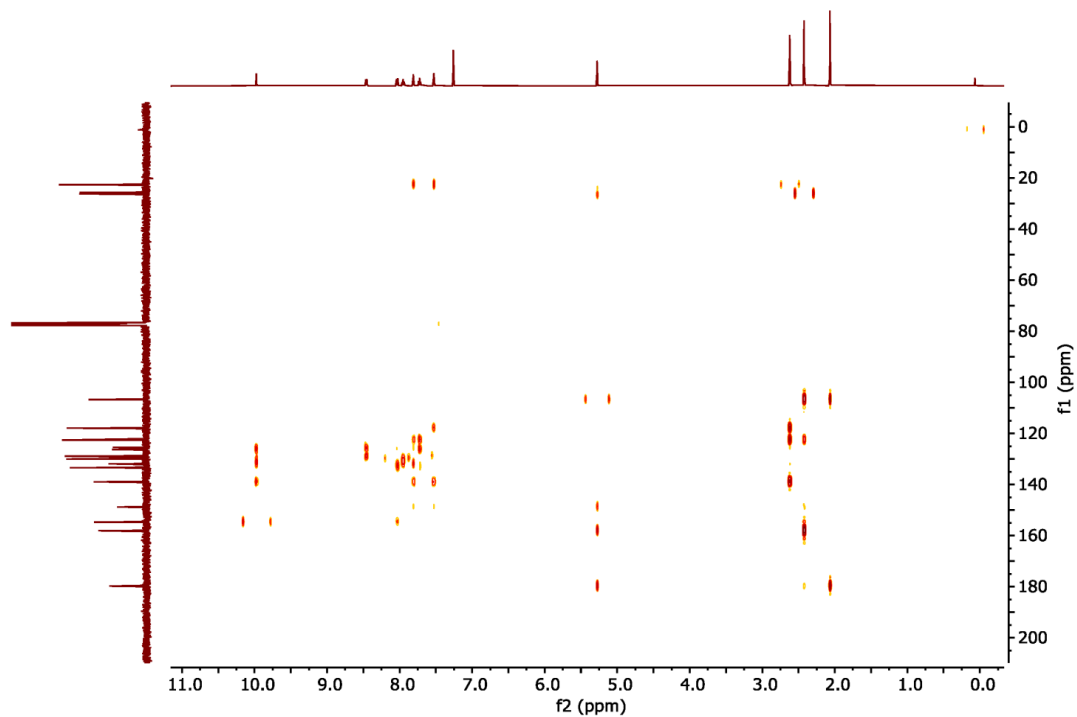

**Figure S22.** HMBC spectrum of **1** in CDCl<sub>3</sub>.

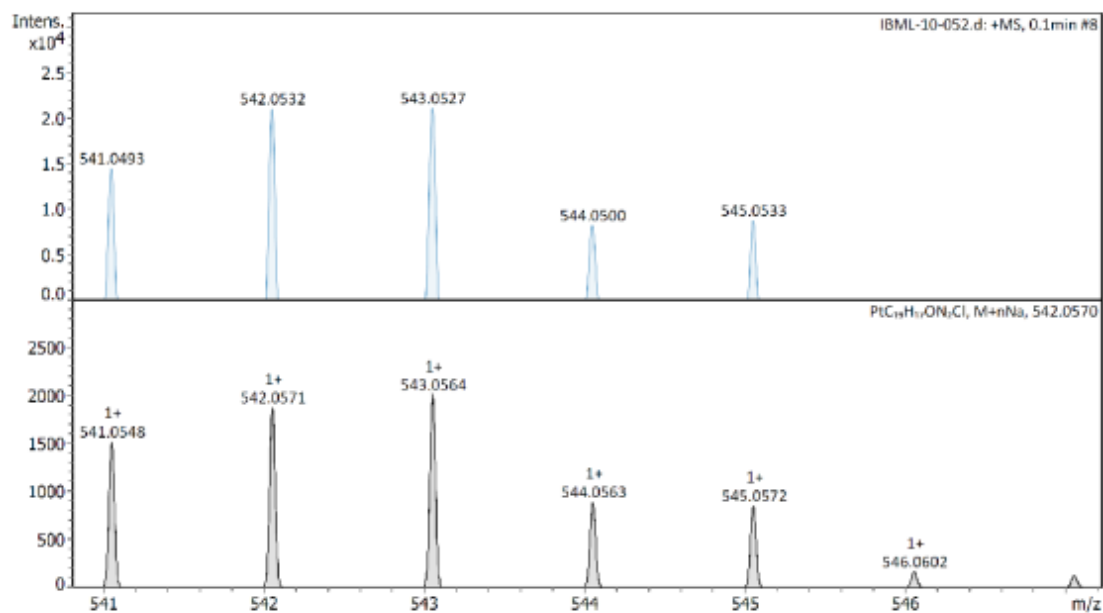

**Figure S23.** HRMS (ESI-TOF positive mode) of **1**.

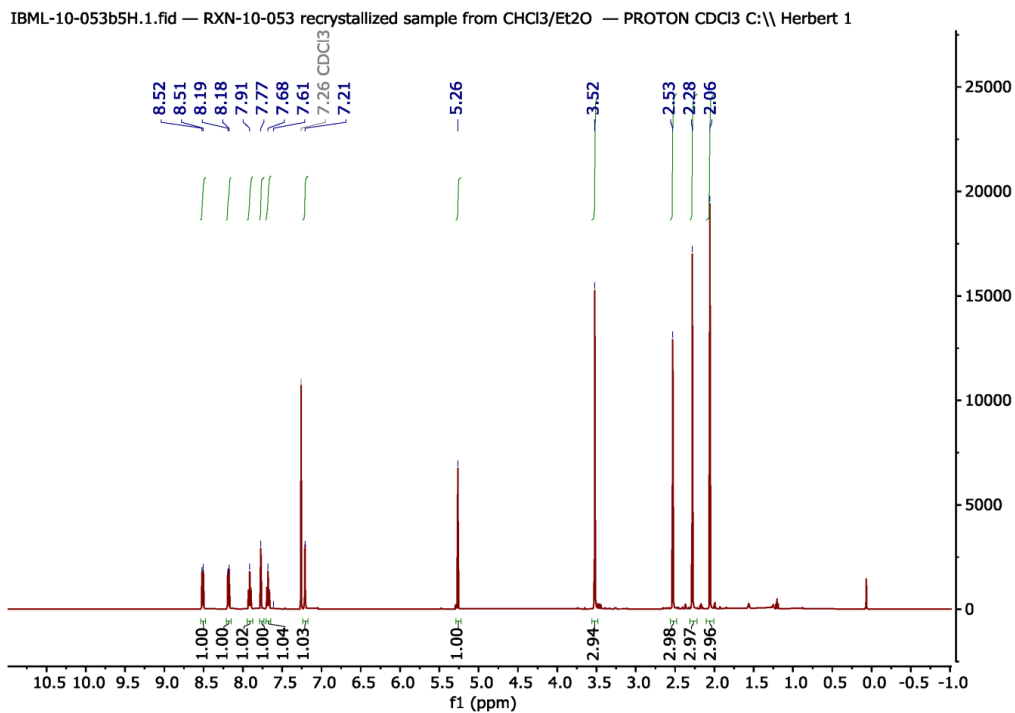

**Figure S24.** <sup>1</sup>H NMR (500 MHz, 25 °C) spectrum of **2** in CDCl<sub>3</sub>.

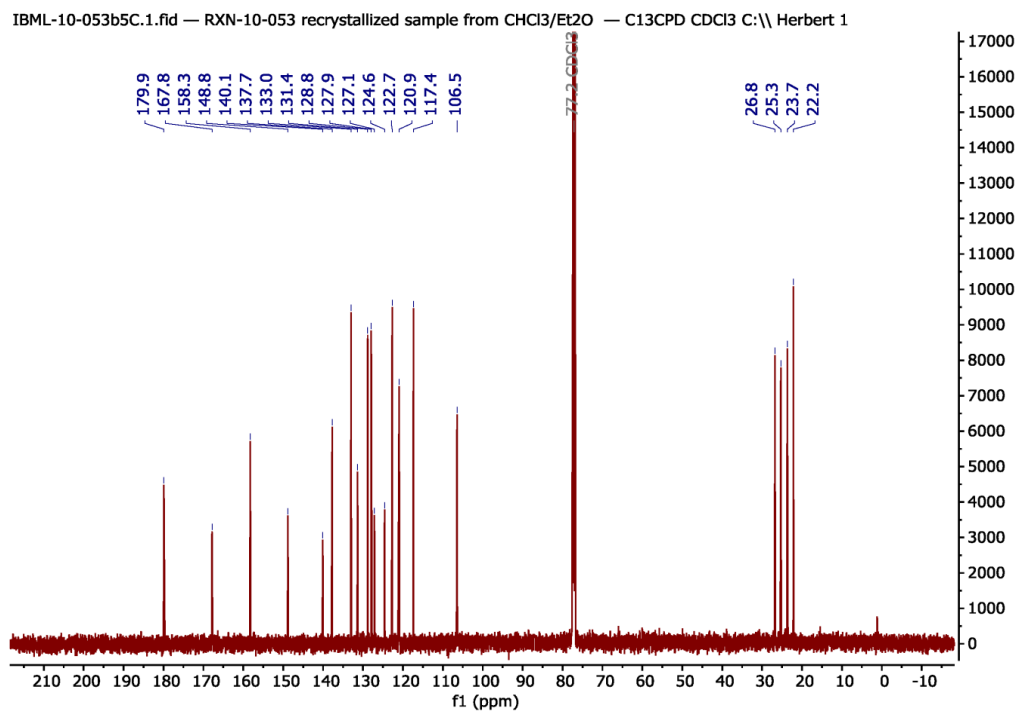

**Figure S25.** <sup>13</sup>C{<sup>1</sup>H} NMR (125 MHz, 25 °C) spectrum of **2** in CDCl<sub>3</sub>.

IBML-10-053b5-COSY.1.ser — RXN-10-053 recrystallized sample from CHCl<sub>3</sub>/Et<sub>2</sub>O — COSYGPSW CDCl<sub>3</sub> C:\\ Herbert 1

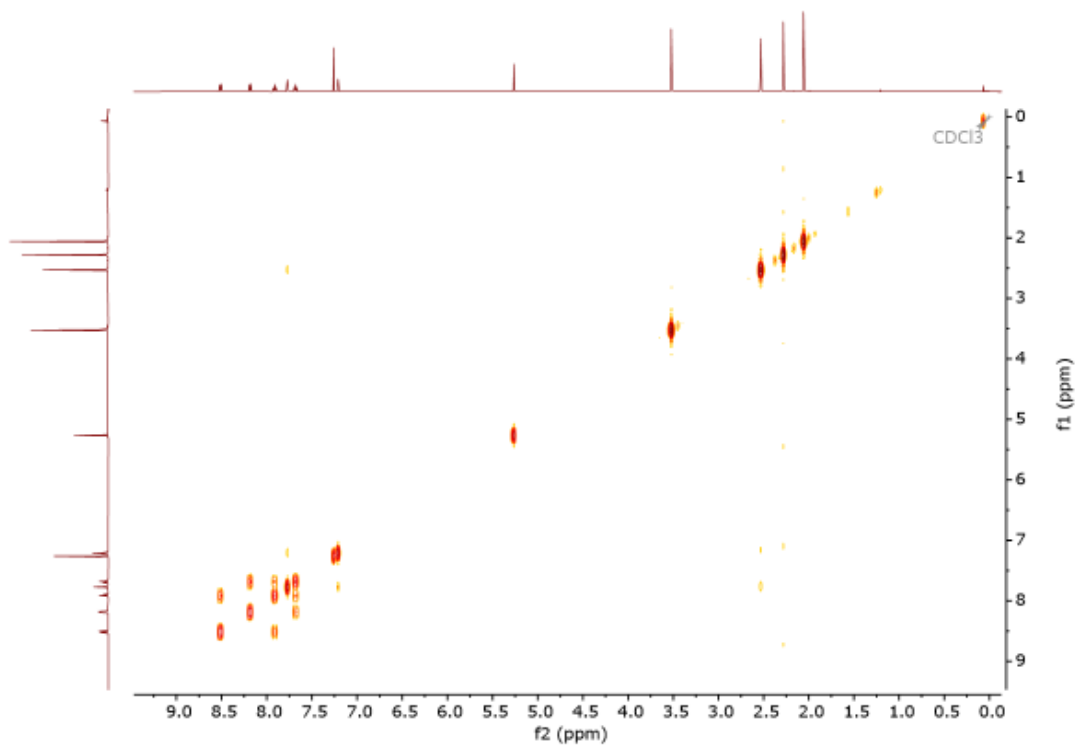

**Figure S26.** <sup>1</sup>H-<sup>1</sup>H COSY spectrum of **2** in CDCl<sub>3</sub>.

IBML-10-053b5-HSQC.1.ser — RXN-10-053 recrystallized sample from CHCl<sub>3</sub>/Et<sub>2</sub>O — HSQC GP CDCl<sub>3</sub> C:\\ Herbert 1

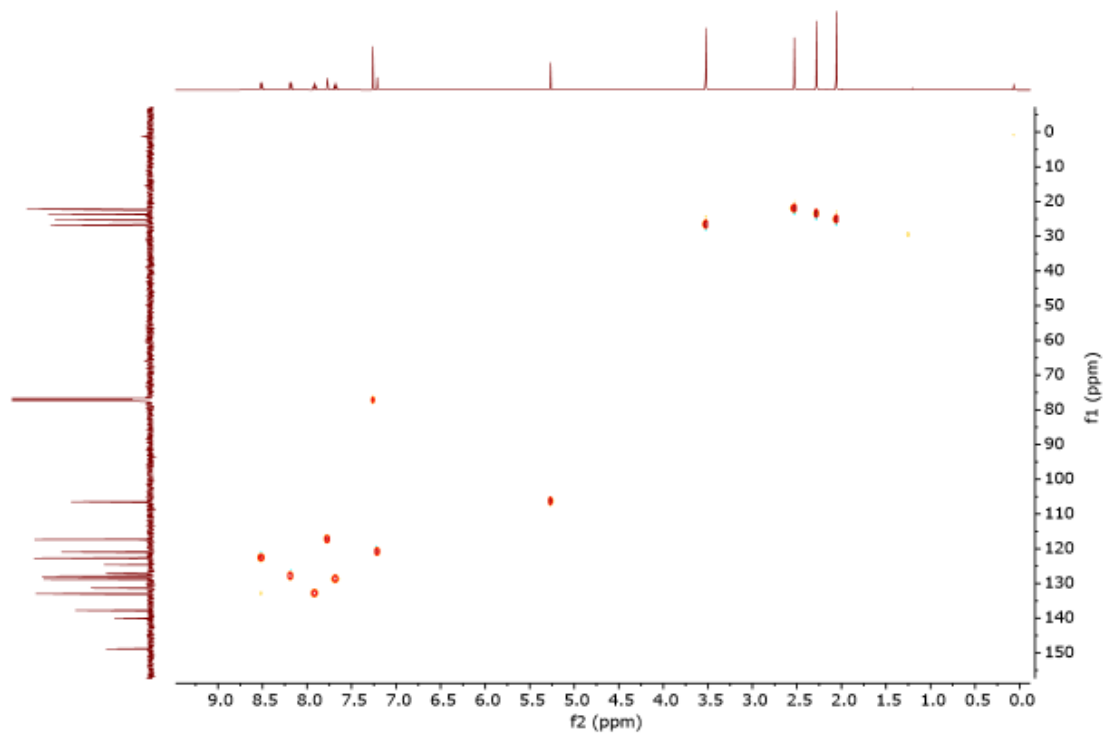

**Figure S27.** HSQC spectrum of **2** in CDCl<sub>3</sub>.

IBML-10-053b5-HMBC.1.ser — RXN-10-053 recrystallized sample from CHCl<sub>3</sub>/Et<sub>2</sub>O — HMBCGPND CDCl<sub>3</sub> C:\ Herbert 1

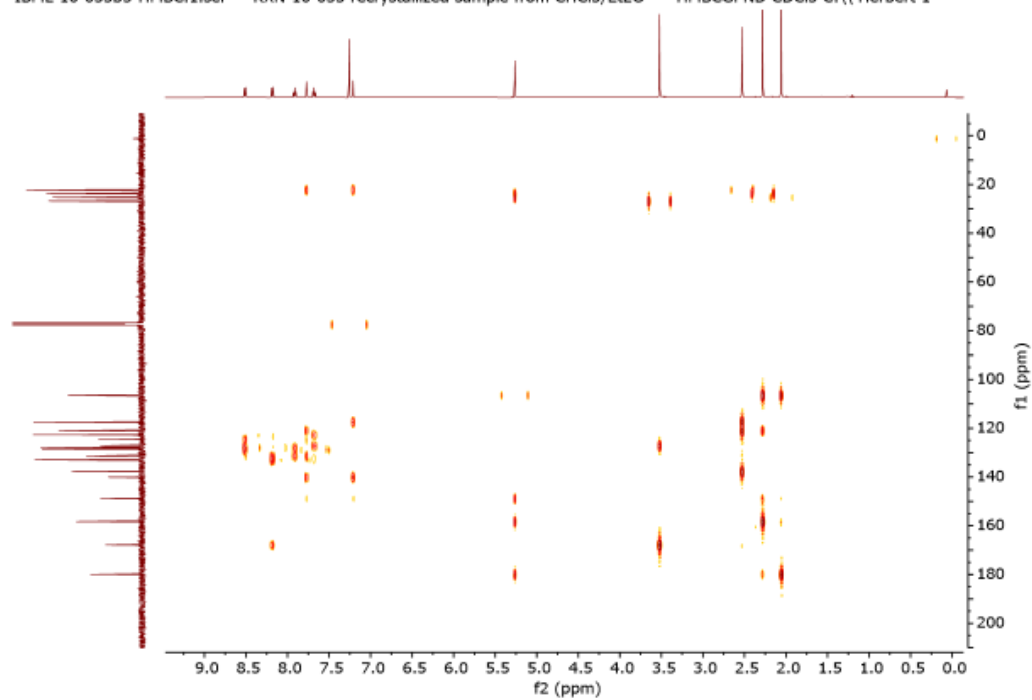

**Figure S28.** HMBC spectrum of **2** in CDCl<sub>3</sub>.

IBML-10-053b5-NOE.1.ser — RXN-10-053 recrystallized sample from CHCl<sub>3</sub>/Et<sub>2</sub>O — NOESYPHSW CDCl<sub>3</sub> C:\ Herbert 1

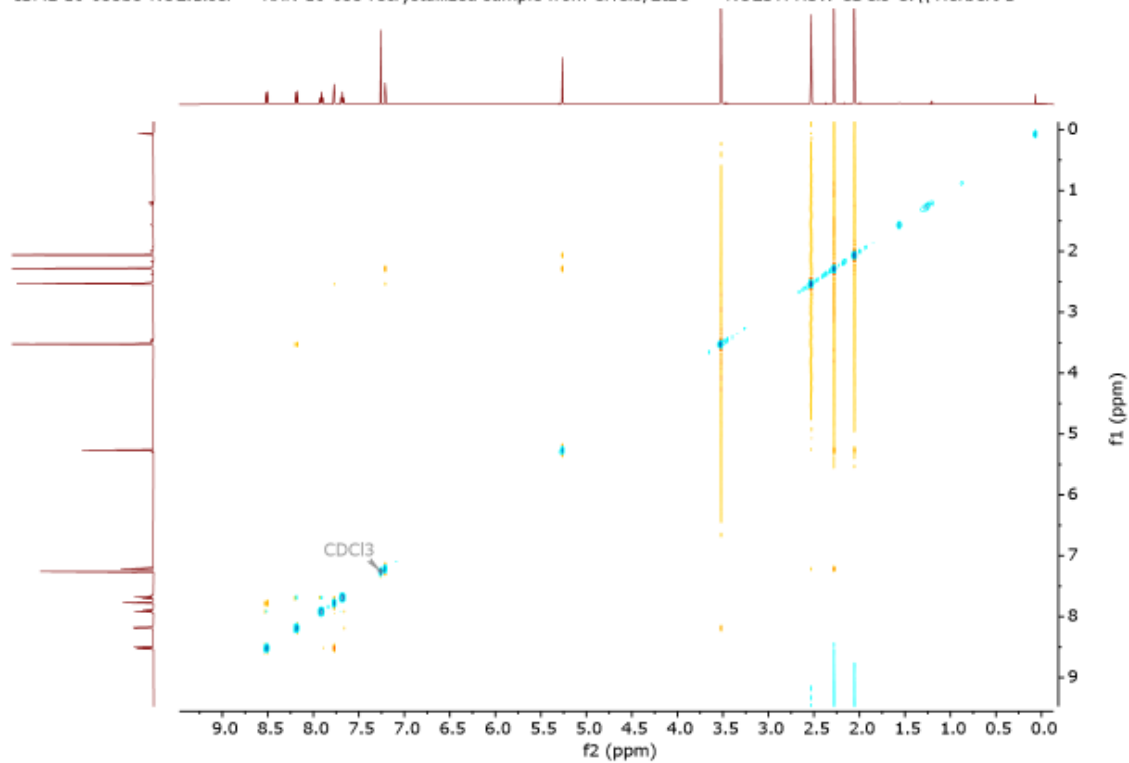

**Figure S29.** 2D-NOESY spectrum of **2** in CDCl<sub>3</sub>.



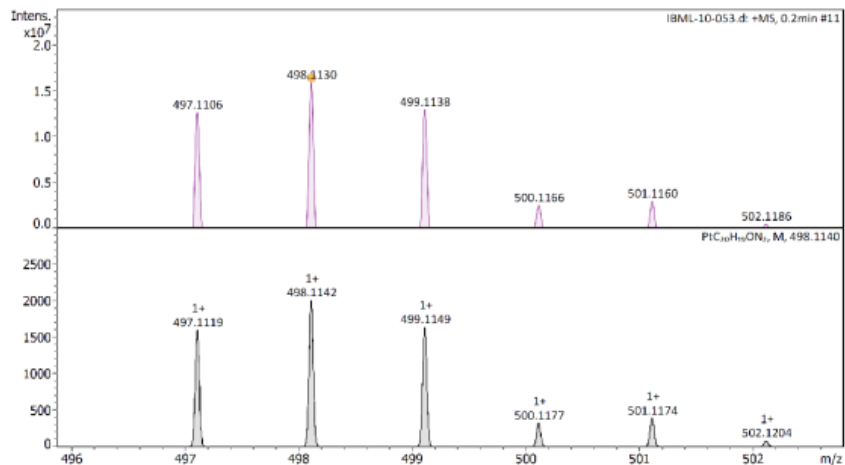

**Figure S30.** HRMS (ESI-TOF positive mode) of **2**.

## Optimized Coordinates

### 1, <sup>1</sup>GS<sub>eq</sub>

|    |                  |                   |                   |
|----|------------------|-------------------|-------------------|
| C  | 3.64099155062907 | 7.71398624007048  | 8.54078991755222  |
| H  | 3.66085520156593 | 6.81299740130944  | 7.93552098767605  |
| C  | 3.52517291969900 | 7.66146048774590  | 9.95225738099578  |
| C  | 3.43503552432320 | 6.42241075577230  | 10.60957427689913 |
| H  | 3.44271994425982 | 5.51474619118351  | 10.01685875537876 |
| C  | 3.34319906980158 | 6.37457065077047  | 11.97705022012024 |
| H  | 3.27493556827839 | 5.42137386393497  | 12.48683935132515 |
| C  | 3.33348658815265 | 7.56545129394147  | 12.71609904540491 |
| H  | 3.26130327612409 | 7.52455183281692  | 13.79670107856893 |
| C  | 3.40389136736768 | 8.78513741457966  | 12.08681772129385 |
| H  | 3.38550071577152 | 9.68819589995348  | 12.68216890972175 |
| C  | 3.49983071407732 | 8.86299067569080  | 10.68923190045281 |
| C  | 3.55857459676318 | 10.10251134300020 | 9.95737804579744  |
| C  | 3.69032703217882 | 10.04261646032461 | 8.56243557078316  |
| C  | 3.75329981819312 | 11.21382043075438 | 7.76449160784690  |
| C  | 3.55539101370367 | 12.42242930670397 | 8.41298816751185  |
| H  | 3.46874806302513 | 13.34183896851751 | 7.86216555619912  |
| C  | 3.43638630540878 | 12.50579150266752 | 9.80622237622328  |
| C  | 3.46286123035922 | 11.36063223092182 | 10.56786094785203 |
| H  | 3.36586633442455 | 11.43405259159642 | 11.64322933520231 |
| C  | 3.25126010736515 | 13.85606750504569 | 10.42835149534051 |
| C  | 4.60923032874852 | 13.33855705408571 | 5.85861518954927  |
| H  | 3.70009421962398 | 13.93019740672750 | 5.99105319387207  |
| H  | 5.17757065764593 | 13.79160267657216 | 5.04938171883164  |
| H  | 5.19876753335655 | 13.40776840713657 | 6.77292929285516  |
| C  | 4.29790072155575 | 11.91164360470463 | 5.49908871942725  |
| C  | 4.43083327863673 | 11.62662967515458 | 4.13634243224913  |
| H  | 4.68249001970100 | 12.47321115258357 | 3.51371275170261  |
| C  | 4.31952216642510 | 10.41274009189892 | 3.45735999417389  |
| C  | 4.50949788421026 | 10.39656866917849 | 1.97155975550439  |
| H  | 5.30495285274161 | 9.69175178733749  | 1.72282263557927  |
| H  | 4.75940864615190 | 11.38001244707317 | 1.57705169116120  |
| H  | 3.59841339069812 | 10.03063174469488 | 1.49318216314858  |
| Cl | 3.87025691903977 | 6.75597072528886  | 5.49796090992141  |
| N  | 3.73365252993340 | 8.83815181587929  | 7.88730425330608  |
| N  | 3.96231517779865 | 10.99127398246282 | 6.40098676040653  |
| O  | 4.09612422749563 | 9.27209685908492  | 3.96388088973166  |
| Pt | 3.90025698659982 | 9.03459450386048  | 5.92362364526763  |
| H  | 3.86612193769574 | 14.60826903505056 | 9.93090616391603  |
| H  | 3.51458840848721 | 13.84612984864107 | 11.48706009085698 |
| H  | 2.21011517198218 | 14.18182546528196 | 10.34216510039252 |

### 1, T<sub>1,eq</sub>

|   |                  |                  |                   |
|---|------------------|------------------|-------------------|
| C | 3.64091397656776 | 7.67001189027181 | 8.55988608524942  |
| H | 3.67259971019398 | 6.76913315725141 | 7.96229227634256  |
| C | 3.52698060249842 | 7.63566465472483 | 9.95320504067109  |
| C | 3.45098558970904 | 6.40525189060018 | 10.64699219755702 |
| H | 3.46942591175715 | 5.48456097789733 | 10.07505787503275 |
| C | 3.36112841243195 | 6.38268440740407 | 12.01091166586034 |
| H | 3.30473491039104 | 5.43646287921874 | 12.53577612566853 |
| C | 3.33681641967703 | 7.58631422691348 | 12.73950322591805 |

|    |                  |                   |                   |
|----|------------------|-------------------|-------------------|
| H  | 3.26603630097516 | 7.56102290982921  | 13.82030208480231 |
| C  | 3.38980340491351 | 8.79244092154374  | 12.08542940258651 |
| H  | 3.35897417851243 | 9.70599839449291  | 12.66523791593334 |
| C  | 3.48119901873060 | 8.85140009204606  | 10.68638626377985 |
| C  | 3.52170198345911 | 10.08298062387715 | 9.94460607816017  |
| C  | 3.64801000023510 | 10.01005684820925 | 8.54399501474171  |
| C  | 3.72994322909786 | 11.19492276365234 | 7.74356359634092  |
| C  | 3.53679448009138 | 12.44573072621412 | 8.39787467289380  |
| H  | 3.45498450609625 | 13.35548853498389 | 7.83043632318553  |
| C  | 3.41362301636671 | 12.52301280771909 | 9.76230484926323  |
| C  | 3.43644502068486 | 11.34846373189492 | 10.53254628321148 |
| H  | 3.34580030421238 | 11.43236471007850 | 11.60799851042206 |
| C  | 3.24977207104930 | 13.84648716011460 | 10.44416540247432 |
| C  | 4.71248798231488 | 13.32746602095810 | 5.88571607430769  |
| H  | 3.85276103045884 | 13.99044307655381 | 6.02050611583951  |
| H  | 5.32017022805987 | 13.75194389044787 | 5.08804264516468  |
| H  | 5.30444206270703 | 13.34936059377599 | 6.80085996655282  |
| C  | 4.32012521355810 | 11.92932378252022 | 5.49908466509508  |
| C  | 4.40845733396529 | 11.64420591691558 | 4.14199380531090  |
| H  | 4.66424461504942 | 12.49381335054412 | 3.52196038722582  |
| C  | 4.28796392252438 | 10.43542937545639 | 3.43648319037850  |
| C  | 4.48554655608789 | 10.41486925019137 | 1.95524856368972  |
| H  | 5.29576007553664 | 9.72393803291537  | 1.70977224836937  |
| H  | 4.72475877715622 | 11.40081830464453 | 1.55935095248660  |
| H  | 3.58659087514616 | 10.03488857695199 | 1.46335352344259  |
| Cl | 3.87594012279591 | 6.80627155449541  | 5.44052218038795  |
| N  | 3.71111567523292 | 8.82364282784933  | 7.88606813278310  |
| N  | 3.96769767229409 | 10.97214904435962 | 6.42221238206013  |
| O  | 4.05955709408080 | 9.30027668957170  | 3.96247978209230  |
| Pt | 3.90539129732753 | 9.04180346274666  | 5.92487728347829  |
| H  | 3.41871428518887 | 14.67182126192055 | 9.75142845816511  |
| H  | 3.95966480705470 | 13.94782968434437 | 11.26861821672864 |
| H  | 2.24794732580931 | 13.95610099389907 | 10.87014053634599 |

## 2, <sup>1</sup>GSeq

|   |                  |                   |                   |
|---|------------------|-------------------|-------------------|
| C | 3.64851325668671 | 7.71266951215108  | 8.52508055200103  |
| C | 3.88807931521629 | 6.42881648625052  | 7.81335003273100  |
| C | 3.58800052669988 | 7.70551837388345  | 9.96579594360683  |
| C | 3.62930572037754 | 6.49268023451959  | 10.67824028209702 |
| H | 3.70574685552652 | 5.55937394513205  | 10.13888597183793 |
| C | 3.56276219566733 | 6.47623212244049  | 12.04887927833768 |
| H | 3.59062046268635 | 5.53285641063186  | 12.58057702062919 |
| C | 3.46344511453666 | 7.67777964806296  | 12.75685835905642 |
| H | 3.42620154437715 | 7.66609342103393  | 13.83990347583838 |
| C | 3.40783653610696 | 8.87272161129748  | 12.08213032821888 |
| H | 3.33179615479889 | 9.79295120440001  | 12.64519561282152 |
| C | 3.45916139597048 | 8.91280175668424  | 10.67985708634212 |
| C | 3.42380817677616 | 10.13983962617125 | 9.92927656787276  |
| C | 3.52484867060562 | 10.05083118739565 | 8.53789307884323  |
| C | 3.64834072973710 | 11.22266472886755 | 7.74996879408454  |
| C | 3.42396537164237 | 12.44180010048457 | 8.36250347612368  |
| H | 3.36505708727287 | 13.34467763084438 | 7.77636691152589  |
| C | 3.24776712385370 | 12.54363557116875 | 9.74709257725506  |
| C | 3.29352771750121 | 11.40627338734430 | 10.52013135223583 |
| H | 3.18647950189488 | 11.49070336802249 | 11.59352949482810 |
| C | 3.00497202648131 | 13.89447112123509 | 10.34587738919222 |

|    |                  |                   |                   |
|----|------------------|-------------------|-------------------|
| C  | 5.00096743785895 | 13.22298730996484 | 6.01902358459534  |
| H  | 4.21058383359562 | 13.97655351313282 | 5.96912812918092  |
| H  | 5.79074602092890 | 13.54172972996127 | 5.34070953926442  |
| H  | 5.39357215685861 | 13.20506374058769 | 7.03496380356333  |
| C  | 4.49328596469991 | 11.88139948222258 | 5.57289325460537  |
| C  | 4.66216322474139 | 11.61116793034933 | 4.21052213651168  |
| H  | 5.19613300815954 | 12.36114714049608 | 3.64438074081685  |
| C  | 4.18880973290372 | 10.52413005440378 | 3.47687410710691  |
| C  | 4.49491655382923 | 10.44783360911215 | 2.01211630392820  |
| H  | 5.24843407286972 | 9.67063435145449  | 1.85796997103555  |
| H  | 4.87838053205498 | 11.38823933583425 | 1.61922254891509  |
| H  | 3.60412503761921 | 10.14087493046798 | 1.46308867284378  |
| Cl | 2.39976893307205 | 7.18912738525230  | 5.18085656599433  |
| N  | 3.54380373647073 | 8.84003259803988  | 7.85719930893272  |
| N  | 3.96147288563814 | 11.00077554616816 | 6.41088965309364  |
| O  | 3.52096860673387 | 9.53706706651875  | 3.91465199748606  |
| Pt | 3.41606325638520 | 9.15904038301863  | 5.86156295973470  |
| H  | 3.60606317247858 | 14.65996885003727 | 9.85202414604536  |
| H  | 3.24193661475896 | 13.90647252761642 | 11.41075472606308 |
| H  | 1.95563823463443 | 14.18275023932033 | 10.22894136278222 |
| H  | 4.17455677406195 | 6.60029666945569  | 6.78193948642442  |
| H  | 2.98925736518879 | 5.80966382795414  | 7.79601214914481  |
| H  | 4.67665736004126 | 5.87963233060868  | 8.33133126645131  |

## 2, T<sub>1,eq</sub>

|   |                  |                   |                   |
|---|------------------|-------------------|-------------------|
| C | 3.65966039438627 | 7.67608662919302  | 8.55717800342449  |
| C | 3.93963671416907 | 6.40947617526546  | 7.83067068306883  |
| C | 3.58102687432862 | 7.68398935044045  | 9.97135946523786  |
| C | 3.63272238763062 | 6.47810528557361  | 10.71200851341812 |
| H | 3.71765080409112 | 5.53703885939974  | 10.18719150451955 |
| C | 3.55945733109970 | 6.48180649586038  | 12.07821098359866 |
| H | 3.59284003035960 | 5.54495049312550  | 12.62167151039238 |
| C | 3.44318050605203 | 7.69266776032831  | 12.77755261201097 |
| H | 3.39815762561277 | 7.69251326297658  | 13.85994818305805 |
| C | 3.37890246403673 | 8.87655518543012  | 12.08464585635125 |
| H | 3.28830309082016 | 9.80300339914190  | 12.63653016823383 |
| C | 3.43337528829812 | 8.90390969089044  | 10.68287557717897 |
| C | 3.39724987628178 | 10.12444224783756 | 9.92454346017067  |
| C | 3.49384140587372 | 10.02183118525035 | 8.52636452464228  |
| C | 3.63894742172280 | 11.20389382706056 | 7.72926088692401  |
| C | 3.42550396590873 | 12.46680914241154 | 8.34529255412375  |
| H | 3.36233100241047 | 13.35782444576837 | 7.74103662754079  |
| C | 3.24612785135266 | 12.56405631492564 | 9.70050017293039  |
| C | 3.28525828908591 | 11.39861444428228 | 10.48850575797130 |
| H | 3.19031286834937 | 11.49911618368005 | 11.56203280754374 |
| C | 3.01304290599774 | 13.89064087971501 | 10.35348852142189 |
| C | 5.11279888016230 | 13.17108887770981 | 6.05612624845374  |
| H | 4.40001496811664 | 14.00160895393731 | 6.05976520417256  |
| H | 5.92423159192091 | 13.45068925200262 | 5.38425739983672  |
| H | 5.51992499339655 | 13.07087736236970 | 7.06183005345134  |
| C | 4.50039757672888 | 11.89305149315028 | 5.56671379774208  |
| C | 4.58645442321163 | 11.64859547395230 | 4.20355109137882  |
| H | 5.08092077637655 | 12.42196644767984 | 3.62939114358549  |
| C | 4.14694799917579 | 10.54649325431911 | 3.45637237870100  |
| C | 4.43735878272939 | 10.47621588641250 | 1.99150670041186  |
| H | 5.20357004239526 | 9.71495955377657  | 1.81529209922704  |

|    |                  |                   |                   |
|----|------------------|-------------------|-------------------|
| H  | 4.79703227463906 | 11.42629107139667 | 1.59813174041529  |
| H  | 3.54669334721737 | 10.15936529817604 | 1.44596532204161  |
| Cl | 2.43226902272523 | 7.21455910763568  | 5.19471327570492  |
| N  | 3.52785204841502 | 8.83061546258896  | 7.86893675042720  |
| N  | 3.96853872272170 | 10.97185369424605 | 6.43329438471002  |
| O  | 3.53736124684609 | 9.53120014622489  | 3.92931876835160  |
| Pt | 3.46090299267843 | 9.14491426895737  | 5.87670544938700  |
| H  | 3.21424993681458 | 14.71090777209485 | 9.66356480336011  |
| H  | 3.65933237168864 | 14.01396396667442 | 11.22560504033462 |
| H  | 1.98060359417832 | 13.98471755811208 | 10.70417316517385 |
| H  | 4.32933858940102 | 6.60835727267220  | 6.83741500137132  |
| H  | 3.04012408321658 | 5.80259695996806  | 7.70209201262192  |
| H  | 4.67450263737563 | 5.82436960738467  | 8.38552979537713  |

### 3, <sup>1</sup>GSeq

|   |                  |                   |                   |
|---|------------------|-------------------|-------------------|
| C | 3.63309876697858 | 7.71467978194245  | 8.53566820195441  |
| H | 3.65254189990948 | 6.81412800452090  | 7.92985853747364  |
| C | 3.51069284194698 | 7.66174958261916  | 9.94663115470897  |
| C | 3.41524283204441 | 6.42458229463876  | 10.60707885599846 |
| H | 3.42149778987652 | 5.51520444778925  | 10.01718223520350 |
| C | 3.32037684833601 | 6.38089353238027  | 11.97453355540540 |
| H | 3.24796130162703 | 5.42948571381678  | 12.48683517795394 |
| C | 3.31342549877018 | 7.57333384120965  | 12.71157274751476 |
| H | 3.24079405216783 | 7.53562201856458  | 13.79224043399303 |
| C | 3.38730665082665 | 8.79086034715328  | 12.07966756344297 |
| H | 3.37160819464174 | 9.69559008745233  | 12.67259869629269 |
| C | 3.48471042895525 | 8.86382581162792  | 10.68180644616068 |
| C | 3.54608595348536 | 10.10015277983287 | 9.94814035739757  |
| C | 3.69002610948177 | 10.04276198191533 | 8.55734073155037  |
| C | 3.75842990205322 | 11.21880664943414 | 7.76680230923542  |
| C | 3.55396468802609 | 12.42392719669768 | 8.42032222915993  |
| H | 3.47284960548119 | 13.33745124031774 | 7.86059896963927  |
| C | 3.41542174763666 | 12.50746562351333 | 9.81615886876051  |
| C | 3.43531389879306 | 11.35398209618585 | 10.56320601373179 |
| H | 3.32409616214977 | 11.40374725245217 | 11.63486761987389 |
| C | 3.25511744993096 | 13.87995072649693 | 10.45789656857912 |
| C | 3.07604235598067 | 13.78246401403308 | 11.96885348526422 |
| H | 2.19842292311133 | 13.18798061694272 | 12.23383106239741 |
| H | 2.93317763247388 | 14.78223659297844 | 12.38455581720917 |
| H | 3.95050685950790 | 13.34207000277388 | 12.45396021925814 |
| C | 4.50586786801505 | 14.71543580162782 | 10.16979631930683 |
| H | 4.41495901129889 | 15.70342959856343 | 10.62872597241744 |
| H | 4.66104223843714 | 14.85562960397755 | 9.09784524829380  |
| H | 5.39632789869339 | 14.23170868650318 | 10.57831476351681 |
| C | 2.02063136022939 | 14.58091576702368 | 9.88530485841631  |
| H | 1.11919893242125 | 13.99800907792804 | 10.08572082842508 |
| H | 2.09356996498515 | 14.73352977453187 | 8.80669980081277  |
| H | 1.90477457140694 | 15.56287447891175 | 10.35196792859567 |
| C | 4.61167022730586 | 13.34243858211688 | 5.85619626710680  |
| H | 3.69822421045143 | 13.92814784997776 | 5.98710083310270  |
| H | 5.17794881208367 | 13.79891171584505 | 5.04727276343781  |
| H | 5.20094961154978 | 13.41517385484596 | 6.77080426319732  |
| C | 4.30955135094586 | 11.91346266609191 | 5.49764046706451  |
| C | 4.45070877199868 | 11.62588568605235 | 4.13501723282068  |
| H | 4.70468166582903 | 12.47161447206729 | 3.51201629834771  |
| C | 4.34245178685258 | 10.41158211068011 | 3.45643242348351  |

|    |                  |                   |                  |
|----|------------------|-------------------|------------------|
| C  | 4.53715254301178 | 10.38949829308176 | 1.97103532731668 |
| H  | 5.32608669837600 | 9.67577760706419  | 1.72683962131623 |
| H  | 4.79711832887111 | 11.36877143945495 | 1.57276164524153 |
| H  | 3.62404028501575 | 10.02975214113190 | 1.49148439740682 |
| Cl | 3.87661757612168 | 6.75958989446126  | 5.49338406787937 |
| N  | 3.73367539579605 | 8.83897401282464  | 7.88235093524387 |
| N  | 3.97207334567689 | 10.99611643105852 | 6.40102580302892 |
| O  | 4.11548822204841 | 9.27184989352942  | 3.96364712175399 |
| Pt | 3.90997692838556 | 9.03776832335864  | 5.92160695430702 |

### 3, T<sub>1,eq</sub>

|   |                  |                   |                   |
|---|------------------|-------------------|-------------------|
| C | 3.64633453490927 | 7.66357541993194  | 8.55962202379141  |
| H | 3.67489768436670 | 6.76088303214151  | 7.96427434196548  |
| C | 3.52977587585130 | 7.63117659053399  | 9.95498500174650  |
| C | 3.44812832185045 | 6.40325053407809  | 10.65118777913607 |
| H | 3.46189582154668 | 5.48087703163178  | 10.08195139395335 |
| C | 3.35809246841266 | 6.384444666082757 | 12.01564716926493 |
| H | 3.29688969299489 | 5.43995076471670  | 12.54292235125921 |
| C | 3.34065767212684 | 7.58941066036731  | 12.74146247813111 |
| H | 3.27301982579173 | 7.56702545045628  | 13.82257534110169 |
| C | 3.39688169780955 | 8.79377897500719  | 12.08477808591018 |
| H | 3.37227792018761 | 9.70891189949718  | 12.66241963631475 |
| C | 3.48579787352293 | 8.84795707840403  | 10.68507092389722 |
| C | 3.52373179595987 | 10.07602619588273 | 9.93973447457845  |
| C | 3.65714894093608 | 10.00118212147220 | 8.54508282810719  |
| C | 3.73472246122678 | 11.18666707521935 | 7.74884483301695  |
| C | 3.52575163689432 | 12.42981267890656 | 8.40128366793852  |
| H | 3.44297412171394 | 13.33091116765666 | 7.82115209810277  |
| C | 3.38986897694086 | 12.51442734043064 | 9.77268259333766  |
| C | 3.41736561577478 | 11.34190083227394 | 10.53121516222659 |
| H | 3.31352778149815 | 11.40254234722336 | 11.60308770914225 |
| C | 3.22883133939180 | 13.88231530883054 | 10.42991130734524 |
| C | 3.02649306667281 | 13.77126169263354 | 11.93770760203207 |
| H | 2.14300738726367 | 13.17798064101761 | 12.18545442288256 |
| H | 2.88167991845698 | 14.76839893126174 | 12.35930260322553 |
| H | 3.89181647497756 | 13.32434505196743 | 12.43310325406126 |
| C | 4.49136491938770 | 14.70963744485384 | 10.17068493262820 |
| H | 4.40537170160893 | 15.69325882679111 | 10.64045670208501 |
| H | 4.66104512844386 | 14.85895471316782 | 9.10206412322530  |
| H | 5.37154908748880 | 14.21157361171552 | 10.58443857482558 |
| C | 2.01029932327576 | 14.60217025859250 | 9.84835254638020  |
| H | 1.10039442838800 | 14.02628195939966 | 10.02983873534081 |
| H | 2.10095541656792 | 14.76415598152350 | 8.77233588630294  |
| H | 1.89713421643395 | 15.58092710858389 | 10.32280663895843 |
| C | 4.74825147921624 | 13.32077129270150 | 5.90889048901052  |
| H | 3.89995255274554 | 14.00061817035610 | 6.03748165536557  |
| H | 5.37364333588490 | 13.73919690471227 | 5.12131907071066  |
| H | 5.33084644316344 | 13.32715213102885 | 6.83091299723726  |
| C | 4.33639275820717 | 11.93240018627725 | 5.50821296391323  |
| C | 4.41847006468914 | 11.65329170473040 | 4.14899266665243  |
| H | 4.68147413702893 | 12.50342248709294 | 3.53213577667494  |
| C | 4.28284161612422 | 10.44951255463911 | 3.43891972767481  |
| C | 4.46889859080442 | 10.42737294755976 | 1.95645094748444  |
| H | 5.26160545856527 | 9.71935752919257  | 1.70260830397417  |
| H | 4.72636722196988 | 11.40875077043276 | 1.56030476989092  |
| H | 3.55808553396185 | 10.06829362819237 | 1.46996848111966  |

|    |                  |                   |                  |
|----|------------------|-------------------|------------------|
| Cl | 3.87638190137096 | 6.80846442789334  | 5.43121005248573 |
| N  | 3.72163516593372 | 8.81278069081622  | 7.88578560345559 |
| N  | 3.97494632353702 | 10.96810496841360 | 6.42548277618416 |
| O  | 4.04461756741880 | 9.31277112062773  | 3.96396584209278 |
| Pt | 3.90940672070506 | 9.04156309833444  | 5.92412065385682 |

#### 4, <sup>1</sup>GS<sub>eq</sub>

|    |                   |                   |                   |
|----|-------------------|-------------------|-------------------|
| Pt | -0.96226595637032 | 7.13778197321001  | 6.38922367143552  |
| Cl | -1.17296189762445 | 6.40908104337367  | 4.20586357465322  |
| O  | -2.30155231566984 | 8.52382717404969  | 5.92982684545189  |
| F  | 2.80004853061459  | 8.21856758689376  | 12.05249516587666 |
| N  | 0.28490977427578  | 5.70405891159499  | 6.93713385767357  |
| F  | 2.22636226417775  | 6.30722830730120  | 12.86241132300655 |
| F  | 4.08972568372262  | 6.49893005873586  | 11.79213385567979 |
| N  | -0.64114962422141 | 7.75067467172971  | 8.27835470453079  |
| C  | 0.84980052383339  | 5.90892090667714  | 8.18059564545259  |
| C  | 0.41288045728918  | 7.06373970877996  | 8.88101271873311  |
| C  | -1.43392681207611 | 8.64927497483204  | 8.86097026579113  |
| C  | 0.55060675975264  | 4.62112489038430  | 6.26369495909006  |
| H  | 0.06825991060969  | 4.53694010204444  | 5.29504818157652  |
| C  | 1.10744276998996  | 7.39134843407339  | 10.03798531385136 |
| H  | 0.91868822926584  | 8.30858370608997  | 10.56596776334474 |
| C  | 1.80727542670003  | 5.02731761027272  | 8.70115009482210  |
| C  | 2.11215230626341  | 6.55195376823616  | 10.52136809014519 |
| C  | 2.07184220745335  | 3.80402406995750  | 7.98533877206403  |
| C  | 2.44674938923153  | 5.37545805573353  | 9.89652587260592  |
| H  | 3.22147858644831  | 4.74806904344612  | 10.31305685413813 |
| C  | 1.35146250673182  | 8.96260445500081  | 10.32729060727195 |
| H  | 1.18904896893136  | 8.06528988612976  | 10.92471182410054 |
| H  | 2.28061396540341  | 9.42992817785873  | 10.64615909863772 |
| H  | 0.54573699184533  | 9.66890739776317  | 10.54352084360114 |
| C  | 1.41041381213051  | 3.60815013643400  | 6.75593537486052  |
| C  | 2.81042924578362  | 6.90130606447141  | 11.80587258600689 |
| C  | -2.79187774232458 | 9.28191675380265  | 6.81829672533018  |
| C  | 1.59157544122375  | 2.41880083983065  | 6.03158180468520  |
| H  | 1.06382992519285  | 2.28920543884662  | 5.09353323920213  |
| C  | -2.43112251098611 | 9.34102057649488  | 8.16826403015225  |
| H  | -3.01090166281420 | 10.03193007896508 | 8.76402439922227  |
| C  | -3.87889525894099 | 10.17852519978855 | 6.31219287984419  |
| H  | -3.45253312362735 | 10.87075604417254 | 5.58214150397200  |
| H  | -4.35832818050329 | 10.74484690999119 | 7.10933831708839  |
| H  | -4.62158910692564 | 9.57182592357661  | 5.78991263158977  |
| C  | 2.91304292719491  | 2.78751207904972  | 8.45689347140472  |
| H  | 3.42917050530854  | 2.89944339918419  | 9.40128695809309  |
| C  | 2.41043974793522  | 1.43417609556905  | 6.52082350401325  |
| H  | 2.54558631723850  | 0.51164061308731  | 5.96988922062843  |
| C  | 3.07283633343396  | 1.62525314818646  | 7.74065728660266  |
| H  | 3.71571954992625  | 0.84515578438016  | 8.13111616376953  |

#### 4, T<sub>1,eq</sub>

|    |                   |                  |                   |
|----|-------------------|------------------|-------------------|
| Pt | -1.02873065408422 | 7.07947864640683 | 6.42895437666489  |
| Cl | -1.29210639561141 | 6.38247141831623 | 4.27807792329788  |
| O  | -2.34937864969681 | 8.49024219177852 | 5.97147073826593  |
| F  | 2.77060402443182  | 8.26769947519690 | 12.03612854116537 |
| N  | 0.25924265397903  | 5.66466508559823 | 6.94071559388038  |

|   |                   |                   |                   |
|---|-------------------|-------------------|-------------------|
| F | 2.23998838759950  | 6.34239673569277  | 12.84193291429871 |
| F | 4.08639966433209  | 6.56949500869028  | 11.75033646384569 |
| N | -0.66597372817022 | 7.70066907218112  | 8.27542609133256  |
| C | 0.83034714470056  | 5.88540981993157  | 8.14690824811893  |
| C | 0.38943345520273  | 7.04864517355423  | 8.85681218838578  |
| C | -1.44968811804705 | 8.64533150271019  | 8.87988583985351  |
| C | 0.52050838251212  | 4.54310450625611  | 6.25417559473256  |
| H | 0.02219620921236  | 4.44017860971697  | 5.30091023007089  |
| C | 1.10035538441512  | 7.41349585780629  | 10.02551874717832 |
| H | 0.90785194835214  | 8.34418522071257  | 10.52844578358764 |
| C | 1.79670084515581  | 5.01225490863512  | 8.68668156805863  |
| C | 2.09264495669769  | 6.59855286104675  | 10.50467622558524 |
| C | 2.06880383013080  | 3.78618279508212  | 7.97813402408787  |
| C | 2.42276885637776  | 5.38824868592598  | 9.87575325224026  |
| H | 3.19588716308002  | 4.76778703764172  | 10.30592318695975 |
| C | -1.40161703033403 | 8.88574312087699  | 10.35956840604453 |
| H | -1.25639173351523 | 7.95724168053235  | 10.91256913123283 |
| H | -2.34443866377429 | 9.32834001886106  | 10.67702928345111 |
| H | -0.61046272986985 | 9.58168296679023  | 10.65297932034614 |
| C | 1.39433684853244  | 3.57108628832989  | 6.74550583607305  |
| C | 2.79921704952203  | 6.95185067219460  | 11.77753142372482 |
| C | -2.78208199695624 | 9.32593998788848  | 6.82276948699627  |
| C | 1.61518093045120  | 2.37053760262673  | 6.03264130555417  |
| H | 1.08779074409255  | 2.21535887662342  | 5.09809958719719  |
| C | -2.38147426364449 | 9.39286869688300  | 8.17027070961523  |
| H | -2.91608394029877 | 10.12669236761917 | 8.76000363781316  |
| C | -3.81648156769844 | 10.27096847717369 | 6.30442190774370  |
| H | -3.35261459674420 | 10.95284460566830 | 5.58560299476068  |
| H | -4.27799942144244 | 10.85591284041680 | 7.09931158541122  |
| H | -4.58332832042963 | 9.70648974537762  | 5.76956791643698  |
| C | 2.93522220687856  | 2.79164970421365  | 8.45052360238460  |
| H | 3.45168525859814  | 2.92465904427728  | 9.39268154069829  |
| C | 2.46746939903039  | 1.42074856731160  | 6.52088696359868  |
| H | 2.63052406434206  | 0.50236470658321  | 5.96957261656162  |
| C | 3.13197940149072  | 1.63040663546990  | 7.74278335425634  |
| H | 3.79901300119964  | 0.87121878140100  | 8.13241185848802  |



## REFERENCES

- (1) Pan, L.; Hu, B.; Zhu, X.; Chen, X.; Shang, J.; Tan, H.; Xue, W.; Zhu, Y.; Liu, G.; Li, R.-W. Role of Oxadiazole Moiety in Different D–A Polyazothines and Related Resistive Switching Properties. *J. Mater. Chem. C* **2013**, *1*, 4556.
- (2) Neese, F. The ORCA Program System. *WIREs Comput. Mol. Sci.* **2012**, *2*, 73–78.
- (3) Neese, F. Software Update: The ORCA Program System, Version 4.0. *WIREs Comput. Mol. Sci.* **2018**, *8*, e1327.
